# Supplementary material for: Comprehensive analysis of long noncoding RNA–mRNA co-expression patterns in thyroid cancer
Source: Royal Society of Chemistry journal article supplement (doi:10.1039/c7mb00375g), 2017-08-04
Supplement: c7mb00375g1.zip [file c7mb00375g1.zip]

---

**Comprehensive analysis of long non-coding RNA-mRNA co-expression patterns in thyroid cancer**

Yaying Du, Wenfei Xia, Jinjun Zhang, Dongyi Wan, Zhifang Yang\* and Xingrui Li\*

**Supplementary Table 7:** Five lncRNAs relative expression level in different TNM stages

| lncRNAs name   | I- II stage <sup>a</sup> | III-IV stage  | p-value |
|----------------|--------------------------|---------------|---------|
| CTD-3193O13.11 | 4.7±1.39                 | 6.21±4.26     | 0.108   |
| RP5P-1024C24.1 | 2.6±3.028                | 0.128±0.233   | 0.013*  |
| AC007255.8     | 9.96±11.61               | 37.04±49.42   | 0.036*  |
| HOXD-AS1       | 7.59±7.14                | 13.02±13.27   | 0.046*  |
| RP11-402L6.1   | 22.6±31.04               | 119. 4±277.28 | 0.146   |

**Notes:** Relative expression level are present as mean±SD ;<sup>a</sup>TNM classification was obtained according to the tumour, node, metastasis criteria from The National Comprehensive Cancer Network Clinical Guidelines in Oncology for Thyroid Carcinoma V.3.2012; \*  $P<0.05$ .
