# Supplementary material for: Comprehensive analysis of long noncoding RNA–mRNA co-expression patterns in thyroid cancer
Source: Royal Society of Chemistry journal article supplement (doi:10.1039/c7mb00375g), 2017-08-04
Supplement: c7mb00375g1.zip [file c7mb00375g1.zip]

# Comprehensive analysis of long non-coding RNA-mRNA co-expression patterns in thyroid cancer

Yaying Du, Wenfei Xia, Jinjun Zhang, Dongyi Wan, Zhifang Yang\* and Xingrui Li\*

**Supplementary Table 2:** 452 differentially expressed mRNAs

| test_id     | gene_name | chr   | length | log2FC   | style | p_value |
|-------------|-----------|-------|--------|----------|-------|---------|
| XLOC_058243 | NRK       | chrX  | 136588 | -3.6683  | up    | 0.0015  |
| XLOC_011833 | PCED1B    | chr12 | 157390 | -2.73674 | up    | 0.0015  |
| XLOC_001261 | CHIA      | chr1  | 29705  | -2.69279 | up    | 0.0015  |
| XLOC_024441 | PLEKHH3   | chr17 | 10432  | -1.52052 | up    | 0.0015  |
| XLOC_022999 | LASP1     | chr17 | 54294  | -1.22688 | up    | 0.0015  |
| XLOC_045537 | SPARC     | chr5  | 26070  | -1.11431 | up    | 0.0015  |
| XLOC_007825 | TTC40     | chr10 | 134540 | 1.02401  | down  | 0.0015  |
| XLOC_043469 | ARHGEF28  | chr5  | 316205 | 1.65953  | down  | 0.0015  |
| XLOC_051639 | RELN      | chr7  | 518258 | 3.15461  | down  | 0.0015  |
| XLOC_030446 | HOXD1     | chr2  | 2511   | -5.80902 | up    | 0.00145 |
| XLOC_052526 | ADAMDEC1  | chr8  | 21730  | -4.95571 | up    | 0.00145 |
| XLOC_058252 | CLDN2     | chrX  | 39183  | -3.30521 | up    | 0.00145 |
| XLOC_028046 | ASF1B     | chr19 | 17503  | -3.30358 | up    | 0.00145 |
| XLOC_013652 | E2F7      | chr12 | 44334  | -2.73437 | up    | 0.00145 |
| XLOC_020815 | GPR114    | chr16 | 52997  | -2.38404 | up    | 0.00145 |
| XLOC_031643 | FBXO41    | chr2  | 30431  | -2.22929 | up    | 0.00145 |
| XLOC_003038 | MAP3K6    | chr1  | 13722  | -1.34948 | up    | 0.00145 |
| XLOC_027306 | VASP      | chr19 | 20624  | -1.31124 | up    | 0.00145 |
| XLOC_041628 | PPARGC1A  | chr4  | 380928 | 1.79416  | down  | 0.00145 |
| XLOC_042597 | GALNTL6   | chr4  | 54433  | -4.2582  | up    | 0.0014  |
| XLOC_038586 | EOMES     | chr3  | 6768   | -3.63372 | up    | 0.0014  |
| XLOC_017395 | SYNDIG1L  | chr14 | 20210  | -3.2375  | up    | 0.0014  |
| XLOC_020730 | NOD2      | chr16 | 39749  | -2.11491 | up    | 0.0014  |
| XLOC_048073 | TNFRSF21  | chr6  | 78374  | -2.09983 | up    | 0.0014  |
| XLOC_003801 | MYBPHL    | chr1  | 15317  | -2.05177 | up    | 0.0014  |
| XLOC_011662 | SLCO1C1   | chr12 | 58403  | -1.63769 | up    | 0.0014  |
| XLOC_020790 | MT1E      | chr16 | 1775   | 1.60897  | down  | 0.0014  |
| XLOC_026129 | MRO       | chr18 | 30285  | 2.32244  | down  | 0.0014  |
| XLOC_036708 | CENPM     | chr22 | 8444   | -3.16763 | up    | 0.00135 |
| XLOC_034740 | NKAIN4    | chr20 | 32146  | -3.06157 | up    | 0.00135 |
| XLOC_043344 | GAPT      | chr5  | 5761   | -2.33139 | up    | 0.00135 |
| XLOC_039800 | MASP1     | chr3  | 109598 | 2.18328  | down  | 0.00135 |
| XLOC_001112 | BCAR3     | chr1  | 13706  | 2.68044  | down  | 0.00135 |
| XLOC_004280 | FCRL1     | chr1  | 27875  | -4.31965 | up    | 0.0013  |
| XLOC_004628 | ASPM      | chr1  | 62570  | -3.71796 | up    | 0.0013  |

|             |          |       |        |          |      |         |
|-------------|----------|-------|--------|----------|------|---------|
| XLOC_036967 | SLC6A1   | chr3  | 46527  | -2.23361 | up   | 0.0013  |
| XLOC_047835 | HLA-C    | chr6  | 4113   | -1.32756 | up   | 0.0013  |
| XLOC_014141 | GALNT9   | chr12 | 225556 | 1.3916   | down | 0.0013  |
| XLOC_028731 | KLK4     | chr19 | 4785   | 2.8608   | down | 0.0013  |
| XLOC_043930 | KIF20A   | chr5  | 8997   | -3.14807 | up   | 0.00125 |
| XLOC_003086 | SDC3     | chr1  | 39298  | -1.55709 | up   | 0.00125 |
| XLOC_046167 | RBM24    | chr6  | 12530  | 2.28735  | down | 0.00125 |
| XLOC_026850 | B3GNT3   | chr19 | 21568  | -6.2498  | up   | 0.0012  |
| XLOC_026002 | CDH2     | chr18 | 226540 | -3.96318 | up   | 0.0012  |
| XLOC_023872 | PIK3R6   | chr17 | 65099  | -3.20929 | up   | 0.0012  |
| XLOC_012935 | OLR1     | chr12 | 14153  | -3.19405 | up   | 0.0012  |
| XLOC_027913 | FBN3     | chr19 | 84889  | -1.79432 | up   | 0.0012  |
| XLOC_028146 | ISYNA1   | chr19 | 7668   | -1.66102 | up   | 0.0012  |
| XLOC_010337 | MS4A6A   | chr11 | 13068  | -1.54533 | up   | 0.0012  |
| XLOC_046187 | ID4      | chr6  | 21991  | 1.19696  | down | 0.0012  |
| XLOC_011798 | PDZRN4   | chr12 | 390103 | -3.62653 | up   | 0.00115 |
| XLOC_023246 | DLX4     | chr17 | 6465   | -2.0223  | up   | 0.00115 |
| XLOC_053168 | TRHR     | chr8  | 40249  | -3.5184  | up   | 0.0011  |
| XLOC_039340 | CPNE4    | chr3  | 752001 | -2.8792  | up   | 0.0011  |
| XLOC_004238 | ARHGEF2  | chr1  | 64234  | -1.12374 | up   | 0.0011  |
| XLOC_049510 | IL6      | chr7  | 6119   | 2.75839  | down | 0.0011  |
| XLOC_037047 | THRB     | chr3  | 220005 | 2.83     | down | 0.0011  |
| XLOC_013695 | TSPAN19  | chr12 | 21962  | 3.26438  | down | 0.0011  |
| XLOC_009941 | CALCA    | chr11 | 5791   | -6.49739 | up   | 0.00105 |
| XLOC_023646 | GCGR     | chr17 | 12928  | -4.24351 | up   | 0.00105 |
| XLOC_002410 | RHOA     | chr1  | 12048  | -2.1324  | up   | 0.00105 |
| XLOC_020189 | C16orf59 | chr16 | 4957   | -1.61094 | up   | 0.00105 |
| XLOC_051142 | IGFBP3   | chr7  | 9559   | -1.46578 | up   | 0.00105 |
| XLOC_047891 | HLA-DQB2 | chr6  | 7468   | -3.55957 | up   | 0.001   |
| XLOC_037232 | CCR3     | chr3  | 103233 | -2.39562 | up   | 0.001   |
| XLOC_016374 | PAPLN    | chr14 | 108173 | -1.73052 | up   | 0.001   |
| XLOC_038745 | ALS2CL   | chr3  | 25677  | -1.24285 | up   | 0.001   |
| XLOC_034018 | PCK1     | chr20 | 5378   | 3.21227  | down | 0.001   |
| XLOC_023410 | MILR1    | chr17 | 10119  | -2.99483 | up   | 0.00095 |
| XLOC_048337 | CNR1     | chr6  | 26496  | -2.83379 | up   | 0.00095 |
| XLOC_047899 | HLA-DPA1 | chr6  | 16207  | -1.9352  | up   | 0.00095 |
| XLOC_032568 | TFPI     | chr2  | 101818 | 1.75966  | down | 0.00095 |
| XLOC_027075 | FXRD3    | chr19 | 8497   | -4.78447 | up   | 0.0009  |
| XLOC_036050 | RASD2    | chr22 | 13646  | -3.71511 | up   | 0.0009  |
| XLOC_002061 | RGS1     | chr1  | 4329   | -2.65956 | up   | 0.0009  |
| XLOC_058539 | MAGEC3   | chrX  | 59919  | -2.4173  | up   | 0.0009  |
| XLOC_048669 | CITED2   | chr6  | 5403   | 1.21848  | down | 0.0009  |
| XLOC_027754 | C19orf26 | chr19 | 9770   | -2.53934 | up   | 0.00085 |
| XLOC_037870 | TMEM108  | chr3  | 360367 | -2.32709 | up   | 0.00085 |
| XLOC_028638 | BBC3     | chr19 | 12266  | -2.06299 | up   | 0.00085 |

|             |          |       |        |          |      |         |
|-------------|----------|-------|--------|----------|------|---------|
| XLOC_048729 | ZC3H12D  | chr6  | 37724  | -1.9539  | up   | 0.00085 |
| XLOC_003103 | BAI2     | chr1  | 41182  | -1.48842 | up   | 0.00085 |
| XLOC_023814 | TEKT1    | chr17 | 42629  | 3.36474  | down | 0.00085 |
| XLOC_040793 | IBSP     | chr4  | 12342  | N/A      | up   | 0.00085 |
| XLOC_045484 | C5orf46  | chr5  | 25813  | -6.63777 | up   | 0.0008  |
| XLOC_031928 | AFF3     | chr2  | 597175 | -1.94542 | up   | 0.0008  |
| XLOC_023156 | FMNL1    | chr17 | 26180  | -1.4403  | up   | 0.0008  |
| XLOC_009144 | SERPINH1 | chr11 | 14085  | -1.29693 | up   | 0.0008  |
| XLOC_003040 | CD164L2  | chr1  | 4261   | -4.97901 | up   | 0.00075 |
| XLOC_001746 | SLAMF7   | chr1  | 16118  | -3.14273 | up   | 0.00075 |
| XLOC_013269 | RND1     | chr12 | 8754   | 2.15234  | down | 0.00075 |
| XLOC_008796 | FAM111B  | chr11 | 27180  | -4.27049 | up   | 0.0007  |
| XLOC_023477 | KCNJ2    | chr17 | 11603  | -4.0457  | up   | 0.0007  |
| XLOC_024499 | PLCD3    | chr17 | 24540  | -2.90128 | up   | 0.0007  |
| XLOC_004259 | CRABP2   | chr1  | 6211   | -2.19335 | up   | 0.0007  |
| XLOC_033869 | MYBL2    | chr20 | 49386  | -3.81492 | up   | 0.00065 |
| XLOC_024352 | TOP2A    | chr17 | 29435  | -3.66524 | up   | 0.00065 |
| XLOC_051787 | PRRT4    | chr7  | 11391  | -2.74314 | up   | 0.00065 |
| XLOC_046039 | FOXQ1    | chr6  | 2318   | -2.38362 | up   | 0.00065 |
| XLOC_011478 | CD4      | chr12 | 33963  | -1.96756 | up   | 0.00065 |
| XLOC_036154 | MEI1     | chr22 | 100997 | -1.9204  | up   | 0.00065 |
| XLOC_023826 | DLG4     | chr17 | 29882  | -1.62345 | up   | 0.00065 |
| XLOC_047839 | HLA-B    | chr6  | 3325   | -1.52896 | up   | 0.00065 |
| XLOC_002941 | RAP1GAP  | chr1  | 74210  | 1.37213  | down | 0.00065 |
| XLOC_038577 | NEK10    | chr3  | 262351 | 1.60977  | down | 0.00065 |
| XLOC_045402 | MZB1     | chr5  | 2602   | -6.74354 | up   | 0.0006  |
| XLOC_007319 | PLA2G12B | chr10 | 21896  | -5.3959  | up   | 0.0006  |
| XLOC_046031 | IRF4     | chr6  | 19709  | -3.93797 | up   | 0.0006  |
| XLOC_022529 | ALOX15B  | chr17 | 10240  | -3.61592 | up   | 0.0006  |
| XLOC_037121 | STAC     | chr3  | 167664 | -3.49544 | up   | 0.0006  |
| XLOC_038238 | EPHB3    | chr3  | 20719  | -3.42865 | up   | 0.0006  |
| XLOC_005698 | OLAH     | chr10 | 41626  | -2.99351 | up   | 0.0006  |
| XLOC_024953 | TK1      | chr17 | 13399  | -2.803   | up   | 0.0006  |
| XLOC_011553 | CLEC12A  | chr12 | 44397  | -2.73923 | up   | 0.0006  |
| XLOC_049670 | SUGCT    | chr7  | 746783 | -2.40895 | up   | 0.0006  |
| XLOC_033627 | PCSK2    | chr20 | 258477 | -2.31545 | up   | 0.0006  |
| XLOC_034043 | PHACTR3  | chr20 | 270385 | -2.26246 | up   | 0.0006  |
| XLOC_036383 | GGT2     | chr22 | 20882  | -2.14391 | up   | 0.0006  |
| XLOC_039712 | ZMAT3    | chr3  | 68220  | -1.83784 | up   | 0.0006  |
| XLOC_012266 | PTPRQ    | chr12 | 275895 | 2.23721  | down | 0.0006  |
| XLOC_003768 | COL11A1  | chr1  | 232030 | -5.31659 | up   | 0.00055 |
| XLOC_042280 | TMEM155  | chr4  | 6505   | -4.59449 | up   | 0.00055 |
| XLOC_024496 | KIF18B   | chr17 | 23431  | -3.58484 | up   | 0.00055 |
| XLOC_007786 | ADAM12   | chr10 | 376613 | -2.50014 | up   | 0.00055 |
| XLOC_029680 | GNLY     | chr2  | 13682  | -2.30159 | up   | 0.00055 |

|             |               |       |         |          |      |         |
|-------------|---------------|-------|---------|----------|------|---------|
| XLOC_003161 | COL8A2        | chr1  | 32031   | -1.98604 | up   | 0.00055 |
| XLOC_058345 | LONRF3        | chrX  | 49943   | 2.31331  | down | 0.00055 |
| XLOC_000097 | ESPN          | chr1  | 36602   | -4.97059 | up   | 0.0005  |
| XLOC_053452 | CSMD1         | chr8  | 2059620 | -4.06239 | up   | 0.0005  |
| XLOC_056191 | CDKN2B        | chr9  | 6558    | -3.24779 | up   | 0.0005  |
| XLOC_043856 | PDLIM4        | chr5  | 19353   | -2.83395 | up   | 0.0005  |
| XLOC_027396 | CD37          | chr19 | 11038   | -2.20931 | up   | 0.0005  |
| XLOC_033792 | SPAG4         | chr20 | 6701    | -1.90141 | up   | 0.0005  |
| XLOC_020129 | HAGHL         | chr16 | 8614    | -1.85373 | up   | 0.0005  |
| XLOC_051008 | PDE1C         | chr7  | 548150  | -1.75304 | up   | 0.0005  |
| XLOC_027440 | KLK2          | chr19 | 19398   | 2.54984  | down | 0.0005  |
| XLOC_030597 | AOX1          | chr2  | 91197   | 2.92122  | down | 0.0005  |
| XLOC_030039 | MARCO         | chr2  | 52495   | -4.62299 | up   | 0.00045 |
| XLOC_057615 | PHEX          | chrX  | 229996  | -4.35327 | up   | 0.00045 |
| XLOC_027432 | C19orf81      | chr19 | 10064   | -3.81494 | up   | 0.00045 |
| XLOC_027156 | RYR1          | chr19 | 153899  | -2.86698 | up   | 0.00045 |
| XLOC_002893 | MFAP2         | chr1  | 7036    | -2.59138 | up   | 0.00045 |
| XLOC_039756 | KLHL6         | chr3  | 68356   | -2.494   | up   | 0.00045 |
| XLOC_047898 | HLA-DOA       | chr6  | 13907   | -2.48986 | up   | 0.00045 |
| XLOC_027077 | FXYD5         | chr19 | 15169   | -2.34531 | up   | 0.00045 |
| XLOC_019217 | PLCB2         | chr15 | 29763   | -1.72919 | up   | 0.00045 |
| XLOC_045406 | TMEM173       | chr5  | 7420    | -1.67072 | up   | 0.00045 |
| XLOC_008947 | EHBP1L1       | chr11 | 18166   | -1.62217 | up   | 0.00045 |
| XLOC_025027 | DCXR          | chr17 | 2597    | 1.36821  | down | 0.00045 |
| XLOC_044650 | LIFR          | chr5  | 133687  | 1.88873  | down | 0.00045 |
| XLOC_038733 | SLC6A20       | chr3  | 47989   | -5.4617  | up   | 0.0004  |
| XLOC_002652 | C1orf170      | chr1  | 7083    | -4.44607 | up   | 0.0004  |
| XLOC_034125 | SIRPG         | chr20 | 58412   | -4.30212 | up   | 0.0004  |
| XLOC_046557 | GLP1R         | chr6  | 43090   | -4.2572  | up   | 0.0004  |
| XLOC_059526 | TMEM255A      | chrX  | 52997   | -4.05258 | up   | 0.0004  |
| XLOC_027902 | CTD-3193O13.9 | chr19 | 5722    | -3.86377 | up   | 0.0004  |
| XLOC_004303 | AIM2          | chr1  | 91112   | -3.48133 | up   | 0.0004  |
| XLOC_055155 | MELK          | chr9  | 105121  | -2.94804 | up   | 0.0004  |
| XLOC_022569 | SHISA6        | chr17 | 323871  | -2.41692 | up   | 0.0004  |
| XLOC_051524 | PDK4          | chr7  | 13908   | -2.23194 | up   | 0.0004  |
| XLOC_000490 | SERINC2       | chr1  | 25114   | -1.91767 | up   | 0.0004  |
| XLOC_023539 | ITGB4         | chr17 | 36596   | -1.88785 | up   | 0.0004  |
| XLOC_018298 | SPINT1        | chr15 | 14190   | -1.52847 | up   | 0.0004  |
| XLOC_056914 | MEGF9         | chr9  | 113958  | -1.45785 | up   | 0.0004  |
| XLOC_027010 | ZNF536        | chr19 | 485380  | 2.50893  | down | 0.0004  |
| XLOC_043458 | TMEM171       | chr5  | 20836   | 3.25171  | down | 0.0004  |
| XLOC_041826 | SPINK2        | chr4  | 11969   | -3.79183 | up   | 0.00035 |
| XLOC_012184 | LYZ           | chr12 | 5928    | -2.83448 | up   | 0.00035 |
| XLOC_027989 | ACP5          | chr19 | 4349    | -2.81463 | up   | 0.00035 |
| XLOC_056864 | RNF183        | chr9  | 6410    | -2.50234 | up   | 0.00035 |

|             |          |       |         |          |      |         |
|-------------|----------|-------|---------|----------|------|---------|
| XLOC_038287 | IL1RAP   | chr3  | 144004  | -2.42989 | up   | 0.00035 |
| XLOC_008838 | TMEM132A | chr11 | 12703   | -2.24596 | up   | 0.00035 |
| XLOC_001747 | LY9      | chr1  | 32728   | -2.24135 | up   | 0.00035 |
| XLOC_027338 | NPAS1    | chr19 | 26021   | -1.82403 | up   | 0.00035 |
| XLOC_029617 | HK2      | chr2  | 59379   | -1.81846 | up   | 0.00035 |
| XLOC_019347 | MYEF2    | chr15 | 41483   | -1.80452 | up   | 0.00035 |
| XLOC_051405 | HIP1     | chr7  | 205855  | -1.6525  | up   | 0.00035 |
| XLOC_047110 | GJA1     | chr6  | 14036   | 1.13737  | down | 0.00035 |
| XLOC_039561 | VEPH1    | chr3  | 273880  | 1.75606  | down | 0.00035 |
| XLOC_037526 | EPHA3    | chr3  | 375131  | 1.79635  | down | 0.00035 |
| XLOC_003672 | HFM1     | chr1  | 144104  | 1.93381  | down | 0.00035 |
| XLOC_030811 | DES      | chr2  | 8363    | 2.17335  | down | 0.00035 |
| XLOC_032097 | TFCP2L1  | chr2  | 68687   | 2.32922  | down | 0.00035 |
| XLOC_048851 | C6orf118 | chr6  | 45228   | 3.23836  | down | 0.00035 |
| XLOC_029318 | QPCT     | chr2  | 48267   | -4.21708 | up   | 0.0003  |
| XLOC_045616 | ATP10B   | chr5  | 289200  | -3.98972 | up   | 0.0003  |
| XLOC_023147 | HIGD1B   | chr17 | 4134    | -2.78526 | up   | 0.0003  |
| XLOC_009018 | ALDH3B1  | chr11 | 21236   | -2.69589 | up   | 0.0003  |
| XLOC_033614 | MACROD2  | chr20 | 2057831 | -2.47139 | up   | 0.0003  |
| XLOC_044811 | CENPK    | chr5  | 45406   | -2.09526 | up   | 0.0003  |
| XLOC_048000 | TREM1    | chr6  | 19772   | -2.07347 | up   | 0.0003  |
| XLOC_027412 | CPT1C    | chr19 | 22847   | -1.58135 | up   | 0.0003  |
| XLOC_050764 | MICALL2  | chr7  | 31235   | -1.13046 | up   | 0.0003  |
| XLOC_032638 | FTCDNL1  | chr2  | 188676  | 2.22681  | down | 0.0003  |
| XLOC_018462 | UNC13C   | chr15 | 650220  | 2.23845  | down | 0.0003  |
| XLOC_038286 | CLDN16   | chr3  | 90730   | -6.56502 | up   | 0.00025 |
| XLOC_059214 | CITED1   | chrX  | 5553    | -4.98412 | up   | 0.00025 |
| XLOC_002152 | ADORA1   | chr1  | 77158   | -3.90731 | up   | 0.00025 |
| XLOC_004251 | IQGAP3   | chr1  | 47279   | -3.7883  | up   | 0.00025 |
| XLOC_018844 | ACAN     | chr15 | 71912   | -3.52633 | up   | 0.00025 |
| XLOC_036429 | DERL3    | chr22 | 5594    | -3.34911 | up   | 0.00025 |
| XLOC_000608 | MFSD2A   | chr1  | 17105   | -3.05451 | up   | 0.00025 |
| XLOC_032868 | DOCK10   | chr2  | 277356  | -2.11082 | up   | 0.00025 |
| XLOC_031941 | RFX8     | chr2  | 89391   | -2.06161 | up   | 0.00025 |
| XLOC_051370 | MLXIPL   | chr7  | 55293   | -1.98921 | up   | 0.00025 |
| XLOC_023020 | GRB7     | chr17 | 15062   | -1.97291 | up   | 0.00025 |
| XLOC_030526 | COL3A1   | chr2  | 38480   | -1.76769 | up   | 0.00025 |
| XLOC_009039 | CCND1    | chr11 | 17653   | -1.70236 | up   | 0.00025 |
| XLOC_046194 | SOX4     | chr6  | 6097    | -1.61978 | up   | 0.00025 |
| XLOC_004143 | S100A11  | chr1  | 15402   | -1.51395 | up   | 0.00025 |
| XLOC_004003 | PDE4DIP  | chr1  | 240217  | -1.02292 | up   | 0.00025 |
| XLOC_047164 | ENPP1    | chr6  | 87343   | 1.76242  | down | 0.00025 |
| XLOC_040942 | ANK2     | chr4  | 565637  | 2.11298  | down | 0.00025 |
| XLOC_001229 | KIAA1324 | chr1  | 93970   | 2.92579  | down | 0.00025 |
| XLOC_035487 | TFF3     | chr21 | 3985    | 3.02575  | down | 0.00025 |

|             |          |       |        |          |      |         |
|-------------|----------|-------|--------|----------|------|---------|
| XLOC_034080 | BIRC7    | chr20 | 6458   | -6.19312 | up   | 0.0002  |
| XLOC_011434 | PRMT8    | chr12 | 212671 | -6.19    | up   | 0.0002  |
| XLOC_004425 | F5       | chr1  | 75436  | -5.06867 | up   | 0.0002  |
| XLOC_002113 | C1orf106 | chr1  | 24695  | -4.54922 | up   | 0.0002  |
| XLOC_011056 | TRIM29   | chr11 | 74255  | -4.54123 | up   | 0.0002  |
| XLOC_027448 | SIGLEC7  | chr19 | 11228  | -4.18033 | up   | 0.0002  |
| XLOC_041556 | CLNK     | chr4  | 198471 | -4.09081 | up   | 0.0002  |
| XLOC_002661 | TNFRSF18 | chr1  | 4099   | -3.47635 | up   | 0.0002  |
| XLOC_008798 | DTX4     | chr11 | 39596  | -3.42934 | up   | 0.0002  |
| XLOC_051709 | TFEC     | chr7  | 224849 | -2.61524 | up   | 0.0002  |
| XLOC_004674 | PTPN7    | chr1  | 14727  | -2.29404 | up   | 0.0002  |
| XLOC_050386 | IRF5     | chr7  | 12444  | -2.24537 | up   | 0.0002  |
| XLOC_030972 | FAM132B  | chr2  | 9983   | -2.08305 | up   | 0.0002  |
| XLOC_051000 | NOD1     | chr7  | 54868  | -1.89747 | up   | 0.0002  |
| XLOC_000681 | C1orf228 | chr1  | 51176  | -1.39327 | up   | 0.0002  |
| XLOC_053068 | CPQ      | chr8  | 505071 | 1.34841  | down | 0.0002  |
| XLOC_029228 | DRC1     | chr2  | 54805  | 2.7285   | down | 0.0002  |
| XLOC_041202 | TDO2     | chr4  | 65671  | -5.99024 | up   | 0.00015 |
| XLOC_013540 | C12orf56 | chr12 | 126568 | -4.77216 | up   | 0.00015 |
| XLOC_041911 | IGJ      | chr4  | 26277  | -4.37284 | up   | 0.00015 |
| XLOC_004277 | FCRL3    | chr1  | 26578  | -4.26984 | up   | 0.00015 |
| XLOC_028740 | KLK13    | chr19 | 10043  | -3.97085 | up   | 0.00015 |
| XLOC_032015 | BUB1     | chr2  | 40530  | -3.21587 | up   | 0.00015 |
| XLOC_000027 | SAMD11   | chr1  | 23655  | -2.91676 | up   | 0.00015 |
| XLOC_003105 | SPOCD1   | chr1  | 25630  | -2.72694 | up   | 0.00015 |
| XLOC_013713 | DUSP6    | chr12 | 20614  | -2.67198 | up   | 0.00015 |
| XLOC_057149 | ENTPD2   | chr9  | 6019   | -2.61895 | up   | 0.00015 |
| XLOC_051672 | NRCAM    | chr7  | 309261 | -2.44901 | up   | 0.00015 |
| XLOC_019775 | NMB      | chr15 | 4115   | -2.42607 | up   | 0.00015 |
| XLOC_047959 | CPNE5    | chr6  | 99248  | -1.91505 | up   | 0.00015 |
| XLOC_058998 | SLC38A5  | chrX  | 11807  | -1.91489 | up   | 0.00015 |
| XLOC_053367 | LY6E     | chr8  | 14680  | -1.78353 | up   | 0.00015 |
| XLOC_052549 | SCARA3   | chr8  | 43429  | -1.73983 | up   | 0.00015 |
| XLOC_017326 | ZFP36L1  | chr14 | 10295  | -1.57121 | up   | 0.00015 |
| XLOC_057984 | MSN      | chrX  | 158798 | -1.21005 | up   | 0.00015 |
| XLOC_030382 | CYBRD1   | chr2  | 35888  | 1.28708  | down | 0.00015 |
| XLOC_055895 | AIF1L    | chr9  | 26819  | 1.51243  | down | 0.00015 |
| XLOC_010040 | DCDC1    | chr11 | 539442 | 2.18333  | down | 0.00015 |
| XLOC_012725 | PIWIL1   | chr12 | 50811  | -5.3982  | up   | 0.0001  |
| XLOC_014107 | TMEM132D | chr12 | 833729 | -4.7896  | up   | 0.0001  |
| XLOC_025497 | SIGLEC15 | chr18 | 20727  | -4.69546 | up   | 0.0001  |
| XLOC_050879 | AGR2     | chr7  | 41652  | -3.77133 | up   | 0.0001  |
| XLOC_029843 | CNGA3    | chr2  | 53644  | -3.49224 | up   | 0.0001  |
| XLOC_018134 | GABRG3   | chr15 | 564510 | -3.48183 | up   | 0.0001  |
| XLOC_017682 | AHNAK2   | chr14 | 44164  | -3.45102 | up   | 0.0001  |

|             |          |       |         |          |      |          |
|-------------|----------|-------|---------|----------|------|----------|
| XLOC_010940 | POU2AF1  | chr11 | 103660  | -3.42627 | up   | 0.0001   |
| XLOC_024736 | BRIP1    | chr17 | 182256  | -3.27084 | up   | 0.0001   |
| XLOC_031721 | TRABD2A  | chr2  | 85359   | -2.93383 | up   | 0.0001   |
| XLOC_045536 | FAT2     | chr5  | 87476   | -2.86208 | up   | 0.0001   |
| XLOC_003183 | EPHA10   | chr1  | 51517   | -2.73539 | up   | 0.0001   |
| XLOC_028141 | PDE4C    | chr19 | 48172   | -2.56247 | up   | 0.0001   |
| XLOC_047198 | MYB      | chr6  | 37859   | -2.55821 | up   | 0.0001   |
| XLOC_046579 | MDFI     | chr6  | 17470   | -2.53852 | up   | 0.0001   |
| XLOC_034075 | SLC17A9  | chr20 | 17003   | -2.26625 | up   | 0.0001   |
| XLOC_045515 | CD74     | chr5  | 11293   | -2.03811 | up   | 0.0001   |
| XLOC_016788 | INF2     | chr14 | 33976   | -1.98422 | up   | 0.0001   |
| XLOC_058872 | DMD      | chrX  | 2241765 | -1.95025 | up   | 0.0001   |
| XLOC_007813 | TCERG1L  | chr10 | 223540  | -1.9213  | up   | 0.0001   |
| XLOC_028080 | RASAL3   | chr19 | 13404   | -1.86755 | up   | 0.0001   |
| XLOC_036084 | LGALS1   | chr22 | 4282    | -1.562   | up   | 0.0001   |
| XLOC_057557 | TMSB4X   | chrX  | 2120    | -1.53909 | up   | 0.0001   |
| XLOC_012043 | DGKA     | chr12 | 26897   | -1.51844 | up   | 0.0001   |
| XLOC_048468 | FYN      | chr6  | 216790  | -1.48184 | up   | 0.0001   |
| XLOC_023978 | SREBF1   | chr17 | 32749   | -1.36246 | up   | 0.0001   |
| XLOC_019416 | PRTG     | chr15 | 133508  | 1.62884  | down | 0.0001   |
| XLOC_019405 | WDR72    | chr15 | 249138  | 1.88578  | down | 0.0001   |
| XLOC_052427 | KIAA1456 | chr8  | 93446   | 1.95314  | down | 0.0001   |
| XLOC_048776 | IPCEF1   | chr6  | 202541  | 2.2806   | down | 0.0001   |
| XLOC_053149 | DCSTAMP  | chr8  | 21984   | -10.2289 | up   | 5.00E-05 |
| XLOC_027322 | IGFL2    | chr19 | 18312   | -9.27274 | up   | 5.00E-05 |
| XLOC_008997 | SYT12    | chr11 | 44723   | -8.68544 | up   | 5.00E-05 |
| XLOC_022233 | SLC22A31 | chr16 | 6087    | -8.01688 | up   | 5.00E-05 |
| XLOC_059469 | TRPC5    | chrX  | 315851  | -7.80341 | up   | 5.00E-05 |
| XLOC_049572 | PRR15    | chr7  | 3844    | -7.60595 | up   | 5.00E-05 |
| XLOC_004273 | FCRL5    | chr1  | 39259   | -7.46946 | up   | 5.00E-05 |
| XLOC_045619 | GABRB2   | chr5  | 260622  | -7.26836 | up   | 5.00E-05 |
| XLOC_057049 | FIBCD1   | chr9  | 39711   | -7.20678 | up   | 5.00E-05 |
| XLOC_046759 | COL19A1  | chr6  | 348471  | -7.03834 | up   | 5.00E-05 |
| XLOC_004730 | KLHDC8A  | chr1  | 21034   | -6.73378 | up   | 5.00E-05 |
| XLOC_039781 | LIPH     | chr3  | 53008   | -6.58002 | up   | 5.00E-05 |
| XLOC_003325 | PDZK1IP1 | chr1  | 7452    | -6.34533 | up   | 5.00E-05 |
| XLOC_001942 | BRINP2   | chr1  | 111520  | -6.19858 | up   | 5.00E-05 |
| XLOC_028737 | KLK10    | chr19 | 8838    | -6.16975 | up   | 5.00E-05 |
| XLOC_006155 | ADAMTS14 | chr10 | 89939   | -6.16821 | up   | 5.00E-05 |
| XLOC_031742 | SFTPB    | chr2  | 11493   | -5.9818  | up   | 5.00E-05 |
| XLOC_012153 | HMGA2    | chr12 | 142595  | -5.94386 | up   | 5.00E-05 |
| XLOC_045184 | TRIM36   | chr5  | 55787   | -5.87657 | up   | 5.00E-05 |
| XLOC_059606 | HS6ST2   | chrX  | 335382  | -5.807   | up   | 5.00E-05 |
| XLOC_008826 | MS4A1    | chr11 | 15034   | -5.77059 | up   | 5.00E-05 |
| XLOC_024409 | KRT15    | chr17 | 8823    | -5.74228 | up   | 5.00E-05 |

|             |          |       |        |          |    |          |
|-------------|----------|-------|--------|----------|----|----------|
| XLOC_010142 | LRP4     | chr11 | 68420  | -5.69748 | up | 5.00E-05 |
| XLOC_028562 | KCNN4    | chr19 | 19276  | -5.69636 | up | 5.00E-05 |
| XLOC_019704 | RASGRF1  | chr15 | 130827 | -5.66594 | up | 5.00E-05 |
| XLOC_047921 | GRM4     | chr6  | 133837 | -5.60966 | up | 5.00E-05 |
| XLOC_019633 | STRA6    | chr15 | 32817  | -5.3804  | up | 5.00E-05 |
| XLOC_005924 | RET      | chr10 | 53325  | -5.28245 | up | 5.00E-05 |
| XLOC_033911 | SLC12A5  | chr20 | 38429  | -5.16562 | up | 5.00E-05 |
| XLOC_036618 | TMPRSS6  | chr22 | 46044  | -5.15063 | up | 5.00E-05 |
| XLOC_021810 | CBLN1    | chr16 | 10436  | -5.05128 | up | 5.00E-05 |
| XLOC_032766 | FN1      | chr2  | 80640  | -4.97452 | up | 5.00E-05 |
| XLOC_027286 | APOC1    | chr19 | 5104   | -4.96735 | up | 5.00E-05 |
| XLOC_045354 | CXCL14   | chr5  | 8597   | -4.91815 | up | 5.00E-05 |
| XLOC_032379 | DPP4     | chr2  | 85117  | -4.89829 | up | 5.00E-05 |
| XLOC_004696 | CHIT1    | chr1  | 60815  | -4.68591 | up | 5.00E-05 |
| XLOC_029247 | GCKR     | chr2  | 30346  | -4.67462 | up | 5.00E-05 |
| XLOC_003565 | SLC44A5  | chr1  | 408989 | -4.66861 | up | 5.00E-05 |
| XLOC_004341 | PVRL4    | chr1  | 19027  | -4.60563 | up | 5.00E-05 |
| XLOC_014770 | SCEL     | chr13 | 117528 | -4.59741 | up | 5.00E-05 |
| XLOC_024820 | FAM20A   | chr17 | 70751  | -4.54228 | up | 5.00E-05 |
| XLOC_006145 | COL13A1  | chr10 | 163219 | -4.48171 | up | 5.00E-05 |
| XLOC_021620 | SEZ6L2   | chr16 | 28448  | -4.47733 | up | 5.00E-05 |
| XLOC_023261 | ABCC3    | chr17 | 57631  | -4.43376 | up | 5.00E-05 |
| XLOC_039819 | CLDN1    | chr3  | 26015  | -4.42247 | up | 5.00E-05 |
| XLOC_032946 | NGEF     | chr2  | 134593 | -4.40681 | up | 5.00E-05 |
| XLOC_054532 | KCNQ3    | chr8  | 360180 | -4.36068 | up | 5.00E-05 |
| XLOC_017551 | SERPINA1 | chr14 | 14127  | -4.33325 | up | 5.00E-05 |
| XLOC_006202 | PLAU     | chr10 | 9079   | -4.26223 | up | 5.00E-05 |
| XLOC_051844 | PLXNA4   | chr7  | 525357 | -4.17138 | up | 5.00E-05 |
| XLOC_026845 | FAM129C  | chr19 | 30539  | -4.0928  | up | 5.00E-05 |
| XLOC_002924 | CAMK2N1  | chr1  | 5113   | -4.03117 | up | 5.00E-05 |
| XLOC_038939 | ADAMTS9  | chr3  | 172586 | -3.98579 | up | 5.00E-05 |
| XLOC_051548 | TMEM130  | chr7  | 24285  | -3.94773 | up | 5.00E-05 |
| XLOC_040170 | DOK7     | chr4  | 40289  | -3.91513 | up | 5.00E-05 |
| XLOC_035369 | TIAM1    | chr21 | 441733 | -3.83922 | up | 5.00E-05 |
| XLOC_024306 | SRCIN1   | chr17 | 75933  | -3.83692 | up | 5.00E-05 |
| XLOC_026657 | ICAM5    | chr19 | 7731   | -3.79852 | up | 5.00E-05 |
| XLOC_034553 | SLPI     | chr20 | 2326   | -3.67382 | up | 5.00E-05 |
| XLOC_049378 | SDK1     | chr7  | 967796 | -3.64509 | up | 5.00E-05 |
| XLOC_021285 | PKMYT1   | chr16 | 12516  | -3.5836  | up | 5.00E-05 |
| XLOC_018205 | SCG5     | chr15 | 55423  | -3.54695 | up | 5.00E-05 |
| XLOC_056190 | CDKN2A   | chr9  | 27550  | -3.48257 | up | 5.00E-05 |
| XLOC_020146 | BAIAP3   | chr16 | 15838  | -3.47933 | up | 5.00E-05 |
| XLOC_047594 | ADTRP    | chr6  | 95842  | -3.47554 | up | 5.00E-05 |
| XLOC_023385 | MRC2     | chr17 | 69051  | -3.46304 | up | 5.00E-05 |
| XLOC_001697 | CD1E     | chr1  | 4092   | -3.45394 | up | 5.00E-05 |



|             |         |       |         |          |    |          |
|-------------|---------|-------|---------|----------|----|----------|
| XLOC_005953 | ALOX5   | chr10 | 71940   | -3.4252  | up | 5.00E-05 |
| XLOC_052443 | TUSC3   | chr8  | 369522  | -3.38637 | up | 5.00E-05 |
| XLOC_007309 | SPOCK2  | chr10 | 36749   | -3.38007 | up | 5.00E-05 |
| XLOC_027309 | GIPR    | chr19 | 15535   | -3.37247 | up | 5.00E-05 |
| XLOC_033030 | PASK    | chr2  | 44166   | -3.33518 | up | 5.00E-05 |
| XLOC_006538 | DUSP5   | chr10 | 20037   | -3.33458 | up | 5.00E-05 |
| XLOC_013971 | TESC    | chr12 | 60557   | -3.32563 | up | 5.00E-05 |
| XLOC_023859 | AURKB   | chr17 | 6629    | -3.31349 | up | 5.00E-05 |
| XLOC_029819 | NCAPH   | chr2  | 39170   | -3.24819 | up | 5.00E-05 |
| XLOC_024410 | KRT19   | chr17 | 7947    | -3.22161 | up | 5.00E-05 |
| XLOC_010485 | SPTBN2  | chr11 | 46934   | -3.18793 | up | 5.00E-05 |
| XLOC_045325 | FSTL4   | chr5  | 416139  | -3.16952 | up | 5.00E-05 |
| XLOC_046642 | RUNX2   | chr6  | 336356  | -3.14833 | up | 5.00E-05 |
| XLOC_059035 | SHROOM4 | chrX  | 238775  | -3.11624 | up | 5.00E-05 |
| XLOC_056884 | TNC     | chr9  | 98477   | -3.08221 | up | 5.00E-05 |
| XLOC_035715 | CDC45   | chr22 | 41683   | -3.06417 | up | 5.00E-05 |
| XLOC_002972 | GALE    | chr1  | 5271    | -3.06278 | up | 5.00E-05 |
| XLOC_012356 | PLXNC1  | chr12 | 159199  | -3.05653 | up | 5.00E-05 |
| XLOC_057804 | TIMP1   | chrX  | 12538   | -3.05046 | up | 5.00E-05 |
| XLOC_048078 | PTCHD4  | chr6  | 254660  | -3.01055 | up | 5.00E-05 |
| XLOC_051129 | MYO1G   | chr7  | 18204   | -2.98653 | up | 5.00E-05 |
| XLOC_008623 | MDK     | chr11 | 4373    | -2.97545 | up | 5.00E-05 |
| XLOC_023584 | TMC8    | chr17 | 13733   | -2.93694 | up | 5.00E-05 |
| XLOC_031619 | TGFA    | chr2  | 107028  | -2.89722 | up | 5.00E-05 |
| XLOC_040426 | RHOH    | chr4  | 56025   | -2.86348 | up | 5.00E-05 |
| XLOC_018313 | NUSAP1  | chr15 | 48468   | -2.86134 | up | 5.00E-05 |
| XLOC_058592 | MAMLD1  | chrX  | 152916  | -2.83605 | up | 5.00E-05 |
| XLOC_015167 | POSTN   | chr13 | 36263   | -2.83333 | up | 5.00E-05 |
| XLOC_032007 | MALL    | chr2  | 34472   | -2.81309 | up | 5.00E-05 |
| XLOC_031679 | EVA1A   | chr2  | 125114  | -2.79203 | up | 5.00E-05 |
| XLOC_035416 | RUNX1   | chr21 | 1217078 | -2.76504 | up | 5.00E-05 |
| XLOC_053962 | PLAG1   | chr8  | 51805   | -2.71889 | up | 5.00E-05 |
| XLOC_043910 | TGFBI   | chr5  | 35743   | -2.68305 | up | 5.00E-05 |
| XLOC_024331 | CACNB1  | chr17 | 24441   | -2.55928 | up | 5.00E-05 |
| XLOC_051996 | EZH2    | chr7  | 77087   | -2.53612 | up | 5.00E-05 |
| XLOC_041644 | SEL1L3  | chr4  | 116415  | -2.53121 | up | 5.00E-05 |
| XLOC_046973 | PRDM1   | chr6  | 23650   | -2.50252 | up | 5.00E-05 |
| XLOC_045303 | P4HA2   | chr5  | 103810  | -2.4896  | up | 5.00E-05 |
| XLOC_031930 | LONRF2  | chr2  | 51922   | -2.44802 | up | 5.00E-05 |
| XLOC_017520 | CCDC88C | chr14 | 146615  | -2.44102 | up | 5.00E-05 |
| XLOC_013215 | NELL2   | chr12 | 413665  | -2.42317 | up | 5.00E-05 |
| XLOC_008839 | CD6     | chr11 | 48775   | -2.42017 | up | 5.00E-05 |
| XLOC_026849 | FCHO1   | chr19 | 40851   | -2.39784 | up | 5.00E-05 |
| XLOC_052682 | C8orf4  | chr8  | 3607    | -2.38434 | up | 5.00E-05 |
| XLOC_000434 | SYTL1   | chr1  | 12197   | -2.37873 | up | 5.00E-05 |

|             |         |       |         |          |      |          |
|-------------|---------|-------|---------|----------|------|----------|
| XLOC_009645 | NTM     | chr11 | 970275  | -2.34091 | up   | 5.00E-05 |
| XLOC_021289 | CCDC64B | chr16 | 9280    | -2.29827 | up   | 5.00E-05 |
| XLOC_049482 | HDAC9   | chr7  | 918140  | -2.28968 | up   | 5.00E-05 |
| XLOC_009513 | POU2F3  | chr11 | 84755   | -2.28908 | up   | 5.00E-05 |
| XLOC_034555 | SDC4    | chr20 | 23203   | -2.19265 | up   | 5.00E-05 |
| XLOC_050294 | MET     | chr7  | 126631  | -2.15547 | up   | 5.00E-05 |
| XLOC_011880 | TROAP   | chr12 | 8520    | -2.1489  | up   | 5.00E-05 |
| XLOC_039057 | PROS1   | chr3  | 101033  | -2.1418  | up   | 5.00E-05 |
| XLOC_015227 | TSC22D1 | chr13 | 146918  | -2.13579 | up   | 5.00E-05 |
| XLOC_024614 | COL1A1  | chr17 | 18344   | -2.09885 | up   | 5.00E-05 |
| XLOC_046456 | HLA-DRA | chr6  | 6233    | -2.08949 | up   | 5.00E-05 |
| XLOC_019703 | CTSH    | chr15 | 28517   | -2.02341 | up   | 5.00E-05 |
| XLOC_024329 | PLXDC1  | chr17 | 91180   | -2.01962 | up   | 5.00E-05 |
| XLOC_010754 | CTSC    | chr11 | 44196   | -2.00183 | up   | 5.00E-05 |
| XLOC_042263 | PDE5A   | chr4  | 157433  | -1.99909 | up   | 5.00E-05 |
| XLOC_016206 | LGALS3  | chr14 | 23975   | -1.88335 | up   | 5.00E-05 |
| XLOC_058660 | PLXNA3  | chrX  | 19935   | -1.85162 | up   | 5.00E-05 |
| XLOC_042198 | CFI     | chr4  | 61489   | -1.83968 | up   | 5.00E-05 |
| XLOC_052525 | ADAM28  | chr8  | 167672  | -1.82886 | up   | 5.00E-05 |
| XLOC_052546 | PTK2B   | chr8  | 147912  | -1.81501 | up   | 5.00E-05 |
| XLOC_017607 | WARS    | chr14 | 43044   | -1.81293 | up   | 5.00E-05 |
| XLOC_046429 | LST1    | chr6  | 2786    | -1.80418 | up   | 5.00E-05 |
| XLOC_055800 | PBX3    | chr9  | 221993  | -1.78089 | up   | 5.00E-05 |
| XLOC_013007 | ARHGDIB | chr12 | 19858   | -1.76947 | up   | 5.00E-05 |
| XLOC_023705 | ABR     | chr17 | 226239  | -1.76441 | up   | 5.00E-05 |
| XLOC_046365 | HLA-A   | chr6  | 4727    | -1.7355  | up   | 5.00E-05 |
| XLOC_002935 | ECE1    | chr1  | 128450  | -1.71447 | up   | 5.00E-05 |
| XLOC_037577 | COL8A1  | chr3  | 161800  | -1.70011 | up   | 5.00E-05 |
| XLOC_053716 | CLU     | chr8  | 18236   | -1.6918  | up   | 5.00E-05 |
| XLOC_029665 | TMSB10  | chr2  | 1736    | -1.67899 | up   | 5.00E-05 |
| XLOC_050087 | COL1A2  | chr7  | 36672   | -1.67526 | up   | 5.00E-05 |
| XLOC_039312 | PLXND1  | chr3  | 52951   | -1.64014 | up   | 5.00E-05 |
| XLOC_036914 | BHLHE40 | chr3  | 9577    | -1.61973 | up   | 5.00E-05 |
| XLOC_049921 | AUTS2   | chr7  | 1195089 | -1.54678 | up   | 5.00E-05 |
| XLOC_031747 | ST3GAL5 | chr2  | 50233   | -1.52185 | up   | 5.00E-05 |
| XLOC_021965 | FHOD1   | chr16 | 19521   | -1.48288 | up   | 5.00E-05 |
| XLOC_011763 | BICD1   | chr12 | 277931  | -1.40638 | up   | 5.00E-05 |
| XLOC_008539 | CD44    | chr11 | 94670   | -1.29159 | up   | 5.00E-05 |
| XLOC_027201 | PLD3    | chr19 | 31984   | -1.23436 | up   | 5.00E-05 |
| XLOC_056549 | ALDH1A1 | chr9  | 179781  | 1.61839  | down | 5.00E-05 |
| XLOC_030961 | MLPH    | chr2  | 72036   | 1.73479  | down | 5.00E-05 |
| XLOC_040339 | SOD3    | chr4  | 10931   | 1.79621  | down | 5.00E-05 |
| XLOC_036200 | FBLN1   | chr22 | 98992   | 1.85077  | down | 5.00E-05 |
| XLOC_030045 | PCDP1   | chr2  | 117820  | 1.85114  | down | 5.00E-05 |
| XLOC_031482 | EFEMP1  | chr2  | 58219   | 1.85698  | down | 5.00E-05 |

|             |         |       |        |         |      |          |
|-------------|---------|-------|--------|---------|------|----------|
| XLOC_050231 | CDHR3   | chr7  | 159649 | 1.89688 | down | 5.00E-05 |
| XLOC_020795 | MT1F    | chr16 | 9323   | 2.11309 | down | 5.00E-05 |
| XLOC_021580 | NUPR1   | chr16 | 2348   | 2.12257 | down | 5.00E-05 |
| XLOC_013722 | DCN     | chr12 | 37876  | 2.21009 | down | 5.00E-05 |
| XLOC_010039 | MPPED2  | chr11 | 205663 | 2.34979 | down | 5.00E-05 |
| XLOC_021956 | CDH16   | chr16 | 11070  | 2.62567 | down | 5.00E-05 |
| XLOC_054074 | EYA1    | chr8  | 164800 | 2.64255 | down | 5.00E-05 |
| XLOC_002494 | RYR2    | chr1  | 794360 | 2.89382 | down | 5.00E-05 |
| XLOC_017218 | SLC35F4 | chr14 | 418327 | 3.27284 | down | 5.00E-05 |
| XLOC_016778 | TDRD9   | chr14 | 124208 | 3.39354 | down | 5.00E-05 |
| XLOC_040812 | MMRN1   | chr4  | 75098  | 3.55863 | down | 5.00E-05 |
| XLOC_035214 | LIPI    | chr21 | 104598 | 4.79955 | down | 5.00E-05 |

---
