# Supplementary material for: Comprehensive analysis of long noncoding RNA–mRNA co-expression patterns in thyroid cancer
Source: Royal Society of Chemistry journal article supplement (doi:10.1039/c7mb00375g), 2017-08-04
Supplement: c7mb00375g1.zip [file c7mb00375g1.zip]

---

**Comprehensive analysis of long non-coding RNA-mRNA co-expression patterns in thyroid cancer**

Yaying Du, Wenfei Xia, Jinjun Zhang, Dongyi Wan, Zhifang Yang\* and Xingrui Li\*

**Supplementary Table 8:** Five lncRNAs relative expression level in different lymph node status

| LncRNA name    | N1a-b      | NO          | p-value |
|----------------|------------|-------------|---------|
| CTD-3193O13.11 | 7.36±2.03  | 2.38±0.84   | 0.067   |
| RP5P-1024C24.1 | 3.06±1.96  | 0.59±0.23   | 0.626   |
| AC007255.8     | 11.78±6.38 | 23.48±13.25 | 0.751   |
| HOXD-AS1       | 13.08±4.75 | 4.05±1.57   | 0.228   |
| RP11-402L6.1   | 87.07±57.8 | 2.15±1.01   | 0.01**  |

**Notes:** Relative expression level are present as mean±SD ;lymph node was obtained according to the criteria from The National Comprehensive Cancer Network Clinical Guidelines in Oncology for Thyroid Carcinoma V.3.2012; \*\*  $P < 0.01$ .
