# Supplementary material for: Comprehensive analysis of long noncoding RNA–mRNA co-expression patterns in thyroid cancer
Source: Royal Society of Chemistry journal article supplement (doi:10.1039/c7mb00375g), 2017-08-04
Supplement: c7mb00375g1.zip [file c7mb00375g1.zip]

# Comprehensive analysis of long non-coding RNA-mRNA co-expression patterns in thyroid cancer

Yaying Du, Wenfei Xia, Jinjun Zhang, Dongyi Wan, Zhifang Yang\* and Xingrui Li\*

**Supplementary Table 3:** GO enrichment analyses for 452 mRNAs

| go_id      | go_name                                                              | enrichment  | pvalue      | FDR         |
|------------|----------------------------------------------------------------------|-------------|-------------|-------------|
| GO:0030198 | extracellular matrix organization                                    | 11.57493404 | 9.81201E-16 | 1.46199E-12 |
| GO:0007155 | cell adhesion                                                        | 7.138725838 | 3.07732E-15 | 2.2926E-12  |
| GO:0006955 | immune response                                                      | 7.584714611 | 3.49447E-13 | 1.73559E-10 |
| GO:0030168 | platelet activation                                                  | 8.51098091  | 1.53752E-09 | 5.16244E-07 |
| GO:0006508 | proteolysis                                                          | 5.218207967 | 1.73236E-09 | 5.16244E-07 |
| GO:0007165 | signal transduction                                                  | 3.596096011 | 2.5477E-09  | 6.3268E-07  |
| GO:0060333 | signaling pathway                                                    | 16.02683174 | 2.03624E-08 | 4.33428E-06 |
| GO:0007596 | blood coagulation                                                    | 4.978466252 | 2.40739E-08 | 4.48377E-06 |
| GO:0030574 | collagen catabolic process                                           | 14.46866755 | 5.14089E-08 | 8.51103E-06 |
| GO:0019882 | antigen processing and presentation                                  | 23.83074655 | 5.98354E-08 | 8.91547E-06 |
| GO:0001525 | angiogenesis                                                         | 7.486275745 | 1.06644E-07 | 1.44455E-05 |
| GO:0022617 | extracellular matrix disassembly                                     | 13.18663371 | 1.17878E-07 | 1.46366E-05 |
| GO:0050900 | leukocyte migration                                                  | 10.81769536 | 1.37518E-07 | 1.57617E-05 |
| GO:0030199 | collagen fibril organization                                         | 20.77552263 | 1.6484E-07  | 1.75437E-05 |
| GO:0007411 | axon guidance                                                        | 5.477098125 | 5.74188E-07 | 5.7036E-05  |
| GO:0001501 | skeletal system development                                          | 9.114121289 | 7.02494E-07 | 6.54198E-05 |
| GO:0006915 | apoptotic process                                                    | 3.716721938 | 1.41336E-06 | 0.000123877 |
| GO:0030036 | actin cytoskeleton organization                                      | 8.209173076 | 1.86396E-06 | 0.000154295 |
| GO:0007612 | learning                                                             | 19.84274406 | 2.10002E-06 | 0.000159521 |
| GO:0002576 | platelet degranulation                                               | 11.43203362 | 2.14122E-06 | 0.000159521 |
| GO:0002504 | of peptide or polysaccharide antigen via MHC class II                | 46.29973615 | 4.42077E-06 | 0.000313664 |
| GO:0035556 | intracellular signal transduction                                    | 5.298385299 | 5.64561E-06 | 0.000382362 |
| GO:0031295 | T cell costimulation                                                 | 11.91537327 | 8.37978E-06 | 0.000542864 |
| GO:0010628 | expression                                                           | 7.952244758 | 9.13116E-06 | 0.000566893 |
| GO:0016045 | detection of bacterium                                               | 38.58311346 | 1.02786E-05 | 0.000612603 |
| GO:0000278 | mitotic cell cycle                                                   | 4.464161888 | 1.65159E-05 | 0.00094649  |
| GO:0045944 | positive regulation of transcription from RNA polymerase II promoter | 3.269755378 | 1.86088E-05 | 0.001026931 |
| GO:0034097 | response to cytokine stimulus                                        | 13.35569312 | 2.32741E-05 | 0.001238516 |
| GO:0045087 | innate immune response                                               | 3.551875065 | 3.34477E-05 | 0.001718519 |
| GO:0043065 | process                                                              | 5.875601034 | 3.79006E-05 | 0.001882396 |
| GO:0050890 | cognition                                                            | 27.23513891 | 4.77577E-05 | 0.002295449 |
| GO:0032964 | collagen biosynthetic process                                        | 57.87467018 | 5.02018E-05 | 0.002337522 |
| GO:0044281 | small molecule metabolic process                                     | 2.462751923 | 6.30557E-05 | 0.002847059 |
| GO:0008285 | proliferation                                                        | 4.203188337 | 6.86041E-05 | 0.003006476 |
| GO:0051591 | response to cAMP                                                     | 15.23017636 | 7.4444E-05  | 0.003169187 |
| GO:0000187 | activation of MAPK activity                                          | 8.528898764 | 7.8237E-05  | 0.003238142 |

|            |                                                                           |             |             |             |
|------------|---------------------------------------------------------------------------|-------------|-------------|-------------|
| GO:0002606 | positive regulation of dendritic cell antigen processing and presentation | 49.60686016 | 8.72891E-05 | 0.003422652 |
| GO:0015693 | magnesium ion transport                                                   | 49.60686016 | 8.72891E-05 | 0.003422652 |
| GO:0097190 | apoptotic signaling pathway                                               | 8.102453826 | 0.000109233 | 0.004173244 |
| GO:0035023 | transduction                                                              | 10.06516003 | 0.000121132 | 0.004512185 |
| GO:0030325 | adrenal gland development                                                 | 21.04533461 | 0.000141853 | 0.005155154 |
| GO:0005975 | carbohydrate metabolic process                                            | 4.196350708 | 0.000146242 | 0.0051881   |
| GO:0042127 | regulation of cell proliferation                                          | 7.502272061 | 0.000179373 | 0.006215493 |
| GO:0002480 | of exogenous peptide antigen via MHC class I, TAP-independent             | 38.58311346 | 0.000206814 | 0.007003473 |
| GO:0016042 | lipid catabolic process                                                   | 8.791089142 | 0.000261241 | 0.008474456 |
| GO:0010976 | projection development                                                    | 11.81115718 | 0.000261628 | 0.008474456 |
| GO:0030217 | T cell differentiation                                                    | 17.80759083 | 0.000282103 | 0.008770013 |
| GO:0008284 | proliferation                                                             | 3.66117135  | 0.000282524 | 0.008770013 |
| GO:0000272 | polysaccharide catabolic process                                          | 115.7493404 | 0.000297773 | 0.009054732 |
| GO:0051056 | mediated signal transduction                                              | 5.680949221 | 0.000374312 | 0.011154487 |
| GO:0043066 | process                                                                   | 3.348121416 | 0.000387902 | 0.011332828 |
| GO:0002063 | chondrocyte development                                                   | 31.56800192 | 0.000401049 | 0.011491606 |
| GO:0016337 | cell-cell adhesion                                                        | 8.075535375 | 0.000420045 | 0.01159014  |
| GO:0050852 | T cell receptor signaling pathway                                         | 8.075535375 | 0.000420045 | 0.01159014  |
| GO:0045893 | DNA-dependent                                                             | 3.300388524 | 0.000450575 | 0.012206496 |
| GO:0019221 | pathway                                                                   | 4.822889182 | 0.000484744 | 0.012897642 |
| GO:0007162 | negative regulation of cell adhesion                                      | 14.93539876 | 0.000573839 | 0.015000365 |
| GO:0007268 | synaptic transmission                                                     | 3.617166887 | 0.000595663 | 0.015188196 |
| GO:0019886 | of exogenous peptide antigen via MHC class II                             | 7.548870024 | 0.000610026 | 0.015188196 |
| GO:0042493 | response to drug                                                          | 4.224428481 | 0.000611605 | 0.015188196 |
| GO:0007568 | aging                                                                     | 7.388255768 | 0.000686565 | 0.016770199 |
| GO:0071526 | pathway                                                                   | 24.80343008 | 0.000867849 | 0.019021426 |
| GO:0009595 | detection of biotic stimulus                                              | 77.16622691 | 0.000888201 | 0.019021426 |
| GO:0014009 | glial cell proliferation                                                  | 77.16622691 | 0.000888201 | 0.019021426 |
| GO:0033004 | activation                                                                | 77.16622691 | 0.000888201 | 0.019021426 |
| GO:0035986 | heterochromatin focus assembly                                            | 77.16622691 | 0.000888201 | 0.019021426 |
| GO:0045058 | T cell selection                                                          | 77.16622691 | 0.000888201 | 0.019021426 |
| GO:0055118 | muscle contraction                                                        | 77.16622691 | 0.000888201 | 0.019021426 |
| GO:0086001 | action potential                                                          | 77.16622691 | 0.000888201 | 0.019021426 |
| GO:0006629 | lipid metabolic process                                                   | 5.005376881 | 0.000893624 | 0.019021426 |
| GO:0042060 | wound healing                                                             | 9.042917216 | 0.000940975 | 0.019747213 |
| GO:0010951 | endopeptidase activity                                                    | 8.903795413 | 0.001012229 | 0.020660566 |
| GO:0060337 | pathway                                                                   | 8.903795413 | 0.001012229 | 0.020660566 |
| GO:0030261 | chromosome condensation                                                   | 23.14986807 | 0.001077869 | 0.021605154 |
| GO:0006952 | defense response                                                          | 8.768889422 | 0.001087508 | 0.021605154 |
| GO:0055085 | transmembrane transport                                                   | 3.012064619 | 0.001146734 | 0.022291907 |
| GO:0007584 | response to nutrient                                                      | 8.638010475 | 0.001166959 | 0.022291907 |
| GO:0050731 | tyrosine phosphorylation                                                  | 8.638010475 | 0.001166959 | 0.022291907 |
| GO:0008360 | regulation of cell shape                                                  | 6.551849455 | 0.001319124 | 0.024879673 |
| GO:0001568 | blood vessel development                                                  | 11.87172722 | 0.001420565 | 0.026458016 |
| GO:0000082 | G1/S transition of mitotic cell cycle                                     | 5.365863461 | 0.001446422 | 0.026502226 |

|            |                                      |             |             |             |
|------------|--------------------------------------|-------------|-------------|-------------|
| GO:0030203 | process                              | 6.430518909 | 0.001458512 | 0.026502226 |
| GO:0030178 | signaling pathway                    | 11.57493404 | 0.001567714 | 0.028143305 |
| GO:0019048 | virus-host interaction               | 3.745933345 | 0.001591937 | 0.028237931 |
| GO:0046777 | protein autophosphorylation          | 5.193880658 | 0.001759583 | 0.029905509 |
| GO:0010815 | bradykinin catabolic process         | 57.87467018 | 0.001766231 | 0.029905509 |
| GO:2000774 | senescence                           | 57.87467018 | 0.001766231 | 0.029905509 |
|            | positive regulation of cysteine-type |             |             |             |
| GO:2001056 | endopeptidase activity               | 57.87467018 | 0.001766231 | 0.029905509 |
| GO:0007166 | pathway                              | 5.160798615 | 0.001828257 | 0.030607899 |
| GO:0007416 | synapse assembly                     | 11.0237467  | 0.001894149 | 0.030710434 |
| GO:0032320 | activity                             | 19.29155673 | 0.001896215 | 0.030710434 |
| GO:0042730 | fibrinolysis                         | 19.29155673 | 0.001896215 | 0.030710434 |
| GO:0032496 | response to lipopolysaccharide       | 6.092070546 | 0.001946738 | 0.031189678 |
| GO:0042593 | glucose homeostasis                  | 7.716622691 | 0.001971302 | 0.031247239 |
| GO:0045471 | response to ethanol                  | 7.516190933 | 0.002225149 | 0.034367847 |
|            | negative regulation of transcription |             |             |             |
| GO:0000122 | from RNA polymerase II promoter      | 2.95626999  | 0.002227957 | 0.034367847 |
| GO:0031648 | protein destabilization              | 18.27621164 | 0.00223737  | 0.034367847 |
| GO:0042326 | phosphorylation                      | 17.36240106 | 0.002615392 | 0.039362964 |
| GO:0070371 | ERK1 and ERK2 cascade                | 17.36240106 | 0.002615392 | 0.039362964 |
| GO:0001913 | T cell mediated cytotoxicity         | 46.29973615 | 0.002926877 | 0.041141949 |
| GO:0002830 | immune response                      | 46.29973615 | 0.002926877 | 0.041141949 |
| GO:0019217 | process                              | 46.29973615 | 0.002926877 | 0.041141949 |
|            | positive regulation of mammary       |             |             |             |
| GO:0033601 | gland epithelial cell proliferation  | 46.29973615 | 0.002926877 | 0.041141949 |
| GO:0033619 | membrane protein proteolysis         | 46.29973615 | 0.002926877 | 0.041141949 |
| GO:0051983 | segregation                          | 46.29973615 | 0.002926877 | 0.041141949 |
|            | cell differentiation involved in     |             |             |             |
| GO:0060706 | embryonic placenta development       | 46.29973615 | 0.002926877 | 0.041141949 |
| GO:0006816 | calcium ion transport                | 7.057886608 | 0.002966823 | 0.041313698 |
| GO:0042220 | response to cocaine                  | 16.53562005 | 0.003031814 | 0.041519419 |
| GO:0007264 | transduction                         | 3.444920844 | 0.003037327 | 0.041519419 |
| GO:0045766 | positive regulation of angiogenesis  | 6.889841689 | 0.003310005 | 0.044835525 |
| GO:0016338 | adhesion                             | 15.78400096 | 0.003488124 | 0.046822559 |
| GO:0051592 | response to calcium ion              | 9.25994723  | 0.003691421 | 0.049109078 |
| GO:0070374 | ERK2 cascade                         | 6.652260941 | 0.003879122 | 0.051149491 |
| GO:0071300 | cellular response to retinoic acid   | 9.078379637 | 0.00397854  | 0.051641584 |
| GO:0043542 | endothelial cell migration           | 15.09774005 | 0.00398576  | 0.051641584 |
| GO:0030854 | differentiation                      | 38.58311346 | 0.004365214 | 0.055591192 |
| GO:2000505 | regulation of energy homeostasis     | 38.58311346 | 0.004365214 | 0.055591192 |
| GO:0001958 | endochondral ossification            | 14.46866755 | 0.004526116 | 0.056671538 |
| GO:0045776 | pressure                             | 14.46866755 | 0.004526116 | 0.056671538 |
| GO:0009611 | response to wounding                 | 8.735799273 | 0.004599217 | 0.057106947 |
| GO:0006954 | inflammatory response                | 3.531335808 | 0.004641852 | 0.05715999  |
| GO:0007218 | neuropeptide signaling pathway       | 6.29072502  | 0.004984927 | 0.060881483 |
| GO:0006309 | apoptotic DNA fragmentation          | 13.35569312 | 0.005740337 | 0.067347258 |
| GO:0033209 | signaling pathway                    | 13.35569312 | 0.005740337 | 0.067347258 |
| GO:0034446 | spreading                            | 13.35569312 | 0.005740337 | 0.067347258 |

|            |                                                                   |             |             |             |
|------------|-------------------------------------------------------------------|-------------|-------------|-------------|
| GO:0042113 | B cell activation                                                 | 13.35569312 | 0.005740337 | 0.067347258 |
| GO:0048013 | ephrin receptor signaling pathway                                 | 13.35569312 | 0.005740337 | 0.067347258 |
| GO:0006032 | chitin catabolic process                                          | 33.07124011 | 0.006076385 | 0.068073782 |
| GO:0032229 | negative regulation of synaptic transmission, GABAergic           | 33.07124011 | 0.006076385 | 0.068073782 |
| GO:0040036 | regulation of fibroblast growth factor receptor signaling pathway | 33.07124011 | 0.006076385 | 0.068073782 |
| GO:0042304 | process                                                           | 33.07124011 | 0.006076385 | 0.068073782 |
| GO:0043589 | skin morphogenesis                                                | 33.07124011 | 0.006076385 | 0.068073782 |
| GO:0051604 | protein maturation                                                | 33.07124011 | 0.006076385 | 0.068073782 |
| GO:0007507 | heart development                                                 | 4.85661568  | 0.006329296 | 0.070377996 |
| GO:0007159 | leukocyte cell-cell adhesion                                      | 12.86103782 | 0.006416765 | 0.070822069 |
| GO:0000087 | M phase of mitotic cell cycle                                     | 4.092148397 | 0.007074064 | 0.07710255  |
| GO:0019370 | leukotriene biosynthetic process                                  | 12.40171504 | 0.007141042 | 0.07710255  |
| GO:0050690 | virus by virus                                                    | 12.40171504 | 0.007141042 | 0.07710255  |
| GO:0000236 | mitotic prometaphase                                              | 5.787467018 | 0.007215941 | 0.077350733 |
| GO:0007190 | activity                                                          | 11.97406969 | 0.007914342 | 0.081100203 |
| GO:0007631 | feeding behavior                                                  | 11.97406969 | 0.007914342 | 0.081100203 |
| GO:0030219 | megakaryocyte differentiation                                     | 28.93733509 | 0.008055591 | 0.081100203 |
| GO:0032731 | beta production                                                   | 28.93733509 | 0.008055591 | 0.081100203 |
| GO:0035458 | cellular response to interferon-beta                              | 28.93733509 | 0.008055591 | 0.081100203 |
| GO:0042989 | sequestering of actin monomers                                    | 28.93733509 | 0.008055591 | 0.081100203 |
| GO:0045741 | growth factor-activated receptor activity                         | 28.93733509 | 0.008055591 | 0.081100203 |
| GO:0050965 | involved in sensory perception of pain                            | 28.93733509 | 0.008055591 | 0.081100203 |
| GO:0060997 | dendritic spine morphogenesis                                     | 28.93733509 | 0.008055591 | 0.081100203 |
| GO:0007204 | concentration                                                     | 5.564872133 | 0.008571051 | 0.085710512 |
| GO:0006887 | exocytosis                                                        | 7.234333773 | 0.009264449 | 0.092026862 |
| GO:0007257 | activation of JUN kinase activity                                 | 11.20154907 | 0.009612512 | 0.094851935 |
| GO:0010288 | response to lead ion                                              | 25.72207564 | 0.010298098 | 0.097733544 |
| GO:0014902 | myotube differentiation                                           | 25.72207564 | 0.010298098 | 0.097733544 |
| GO:0032863 | activation of Rac GTPase activity                                 | 25.72207564 | 0.010298098 | 0.097733544 |
| GO:0034063 | stress granule assembly                                           | 25.72207564 | 0.010298098 | 0.097733544 |
| GO:0042769 | DNA damage                                                        | 25.72207564 | 0.010298098 | 0.097733544 |
| GO:0043583 | ear development                                                   | 25.72207564 | 0.010298098 | 0.097733544 |
| GO:0051092 | positive regulation of NF-kappaB transcription factor activity    | 5.309602769 | 0.010514847 | 0.099158999 |
| GO:0008283 | cell proliferation                                                | 3.10042876  | 0.011201826 | 0.104973084 |
| GO:0006468 | protein phosphorylation                                           | 3.082083028 | 0.011649537 | 0.108486311 |
| GO:0050821 | protein stabilization                                             | 6.710106688 | 0.012187471 | 0.112181525 |
| GO:0030335 | positive regulation of cell migration                             | 5.076725455 | 0.012759673 | 0.112181525 |
| GO:0002218 | response                                                          | 23.14986807 | 0.012799234 | 0.112181525 |
| GO:0032495 | response to muramyl dipeptide                                     | 23.14986807 | 0.012799234 | 0.112181525 |
| GO:0033235 | sumoylation                                                       | 23.14986807 | 0.012799234 | 0.112181525 |
| GO:0043623 | cellular protein complex assembly                                 | 23.14986807 | 0.012799234 | 0.112181525 |
| GO:0046888 | secretion                                                         | 23.14986807 | 0.012799234 | 0.112181525 |
| GO:0060707 | trophoblast giant cell differentiation                            | 23.14986807 | 0.012799234 | 0.112181525 |

|            |                                                                          |             |             |             |
|------------|--------------------------------------------------------------------------|-------------|-------------|-------------|
| GO:0070208 | protein heterotrimerization                                              | 23.14986807 | 0.012799234 | 0.112181525 |
| GO:2000060 | ubiquitination involved in ubiquitin-dependent protein catabolic process | 23.14986807 | 0.012799234 | 0.112181525 |
| GO:0006811 | ion transport                                                            | 4.209066923 | 0.012945751 | 0.112802156 |
| GO:0001889 | liver development                                                        | 6.521089598 | 0.013514538 | 0.11617197  |
| GO:0001890 | placenta development                                                     | 9.921372032 | 0.013644359 | 0.11617197  |
| GO:0050830 | bacterium                                                                | 9.921372032 | 0.013644359 | 0.11617197  |
| GO:0071230 | stimulus                                                                 | 9.921372032 | 0.013644359 | 0.11617197  |
| GO:0006024 | process                                                                  | 9.645778364 | 0.014790362 | 0.124602344 |
| GO:0007275 | development                                                              | 2.609103984 | 0.015131812 | 0.124602344 |
| GO:0001678 | cellular glucose homeostasis                                             | 21.04533461 | 0.015554387 | 0.124602344 |
| GO:0010812 | adhesion                                                                 | 21.04533461 | 0.015554387 | 0.124602344 |
| GO:0010906 | process                                                                  | 21.04533461 | 0.015554387 | 0.124602344 |
| GO:0016064 | response                                                                 | 21.04533461 | 0.015554387 | 0.124602344 |
| GO:0019372 | lipoxxygenase pathway                                                    | 21.04533461 | 0.015554387 | 0.124602344 |
| GO:0033628 | by integrin                                                              | 21.04533461 | 0.015554387 | 0.124602344 |
| GO:0043518 | response, signal transduction by p53 class mediator                      | 21.04533461 | 0.015554387 | 0.124602344 |
| GO:0050673 | epithelial cell proliferation                                            | 21.04533461 | 0.015554387 | 0.124602344 |
| GO:0060322 | head development                                                         | 21.04533461 | 0.015554387 | 0.124602344 |
| GO:0007229 | integrin-mediated signaling pathway                                      | 6.256721101 | 0.015684253 | 0.124970787 |
| GO:0007160 | cell-matrix adhesion                                                     | 6.173298153 | 0.016456814 | 0.129738902 |
| GO:0034329 | cell junction assembly                                                   | 6.173298153 | 0.016456814 | 0.129738902 |
| GO:0007420 | brain development                                                        | 3.991356564 | 0.016777442 | 0.131570464 |
| GO:0008544 | epidermis development                                                    | 6.092070546 | 0.017254673 | 0.134604521 |
| GO:0032695 | production                                                               | 19.29155673 | 0.018559003 | 0.139069263 |
| GO:0043113 | receptor clustering                                                      | 19.29155673 | 0.018559003 | 0.139069263 |
| GO:0043922 | transcription                                                            | 19.29155673 | 0.018559003 | 0.139069263 |
| GO:0048260 | mediated endocytosis                                                     | 19.29155673 | 0.018559003 | 0.139069263 |
| GO:0000080 | G1 phase of mitotic cell cycle                                           | 8.903795413 | 0.01857368  | 0.139069263 |
| GO:0007188 | protein coupled receptor signaling pathway                               | 8.903795413 | 0.01857368  | 0.139069263 |
| GO:0042542 | response to hydrogen peroxide                                            | 8.903795413 | 0.01857368  | 0.139069263 |
| GO:0045727 | positive regulation of translation                                       | 8.903795413 | 0.01857368  | 0.139069263 |
| GO:0006919 | endopeptidase activity involved in apoptotic process                     | 5.935863609 | 0.018927793 | 0.141012059 |
| GO:0043434 | stimulus                                                                 | 8.681200528 | 0.019952542 | 0.147174692 |
| GO:0045860 | activity                                                                 | 8.681200528 | 0.019952542 | 0.147174692 |
| GO:0006917 | induction of apoptosis                                                   | 3.81591232  | 0.020835021 | 0.149248041 |
| GO:0007067 | mitosis                                                                  | 3.81591232  | 0.020835021 | 0.149248041 |
| GO:0001706 | endoderm formation                                                       | 17.80759083 | 0.02180859  | 0.149248041 |
| GO:0002087 | exchange by neurological system process                                  | 17.80759083 | 0.02180859  | 0.149248041 |
| GO:0007076 | mitotic chromosome condensation                                          | 17.80759083 | 0.02180859  | 0.149248041 |
| GO:0007413 | axonal fasciculation                                                     | 17.80759083 | 0.02180859  | 0.149248041 |
| GO:0030534 | adult behavior                                                           | 17.80759083 | 0.02180859  | 0.149248041 |
| GO:0030889 | proliferation                                                            | 17.80759083 | 0.02180859  | 0.149248041 |
| GO:0045086 | biosynthetic process                                                     | 17.80759083 | 0.02180859  | 0.149248041 |

|            |                                     |             |             |             |
|------------|-------------------------------------|-------------|-------------|-------------|
| GO:0048268 | clathrin coat assembly              | 17.80759083 | 0.02180859  | 0.149248041 |
| GO:0051480 | cytosolic calcium ion homeostasis   | 17.80759083 | 0.02180859  | 0.149248041 |
| GO:0007173 | signaling pathway                   | 3.754032661 | 0.022527769 | 0.149248041 |
|            | rich repeat containing receptor     |             |             |             |
| GO:0035872 | signaling pathway                   | 8.267810026 | 0.022891322 | 0.149248041 |
| GO:0042110 | T cell activation                   | 8.267810026 | 0.022891322 | 0.149248041 |
| GO:0071363 | stimulus                            | 8.267810026 | 0.022891322 | 0.149248041 |
| GO:0006355 | dependent                           | 1.864061463 | 0.023824146 | 0.149248041 |
| GO:0033137 | serine phosphorylation              | 16.53562005 | 0.025298713 | 0.149248041 |
| GO:0042573 | retinoic acid metabolic process     | 16.53562005 | 0.025298713 | 0.149248041 |
| GO:0045332 | phospholipid translocation          | 16.53562005 | 0.025298713 | 0.149248041 |
| GO:0050995 | catabolic process                   | 16.53562005 | 0.025298713 | 0.149248041 |
| GO:0006351 | transcription, DNA-dependent        | 1.710581385 | 0.025751549 | 0.149248041 |
| GO:0043406 | activity                            | 7.89200048  | 0.026075989 | 0.149248041 |
| GO:0043647 | process                             | 7.89200048  | 0.026075989 | 0.149248041 |
| GO:0006813 | potassium ion transport             | 5.261333653 | 0.028935164 | 0.149248041 |
| GO:0002230 | response to virus by host           | 15.43324538 | 0.029024997 | 0.149248041 |
| GO:0008637 | apoptotic mitochondrial changes     | 15.43324538 | 0.029024997 | 0.149248041 |
| GO:0030449 | regulation of complement activation | 15.43324538 | 0.029024997 | 0.149248041 |
| GO:0035265 | organ growth                        | 15.43324538 | 0.029024997 | 0.149248041 |
| GO:0043011 | differentiation                     | 15.43324538 | 0.029024997 | 0.149248041 |
| GO:0048593 | camera-type eye morphogenesis       | 15.43324538 | 0.029024997 | 0.149248041 |
| GO:0060749 | development                         | 15.43324538 | 0.029024997 | 0.149248041 |
|            | negative regulation of G1/S         |             |             |             |
| GO:2000134 | transition of mitotic cell cycle    | 15.43324538 | 0.029024997 | 0.149248041 |
| GO:0006612 | protein targeting to membrane       | 14.46866755 | 0.032983122 | 0.149248041 |
| GO:0006750 | glutathione biosynthetic process    | 14.46866755 | 0.032983122 | 0.149248041 |
| GO:0030279 | negative regulation of ossification | 14.46866755 | 0.032983122 | 0.149248041 |
| GO:0048546 | digestive tract morphogenesis       | 14.46866755 | 0.032983122 | 0.149248041 |
| GO:0048566 | development                         | 14.46866755 | 0.032983122 | 0.149248041 |
| GO:0050870 | activation                          | 14.46866755 | 0.032983122 | 0.149248041 |
| GO:0061098 | tyrosine kinase activity            | 14.46866755 | 0.032983122 | 0.149248041 |
| GO:0071158 | arrest                              | 14.46866755 | 0.032983122 | 0.149248041 |
|            | baroreceptor response to increased  |             |             |             |
| GO:0001984 | systemic arterial blood pressure    | 115.7493404 | 0.034557432 | 0.149248041 |
| GO:0002253 | activation of immune response       | 115.7493404 | 0.034557432 | 0.149248041 |
| GO:0002367 | immune response                     | 115.7493404 | 0.034557432 | 0.149248041 |
|            | immunoglobulin biosynthetic         |             |             |             |
| GO:0002642 | process                             | 115.7493404 | 0.034557432 | 0.149248041 |
| GO:0002667 | regulation of T cell anergy         | 115.7493404 | 0.034557432 | 0.149248041 |
| GO:0002710 | mediated immunity                   | 115.7493404 | 0.034557432 | 0.149248041 |
| GO:0002732 | cytokine production                 | 115.7493404 | 0.034557432 | 0.149248041 |
| GO:0002764 | signaling pathway                   | 115.7493404 | 0.034557432 | 0.149248041 |
| GO:0002792 | secretion                           | 115.7493404 | 0.034557432 | 0.149248041 |
| GO:0002793 | secretion                           | 115.7493404 | 0.034557432 | 0.149248041 |
|            | inflammatory response to antigenic  |             |             |             |
| GO:0002866 | stimulus                            | 115.7493404 | 0.034557432 | 0.149248041 |
| GO:0003062 | signal                              | 115.7493404 | 0.034557432 | 0.149248041 |

|            |                                                           |             |             |             |
|------------|-----------------------------------------------------------|-------------|-------------|-------------|
| GO:0003131 | signaling                                                 | 115.7493404 | 0.034557432 | 0.149248041 |
| GO:0006030 | chitin metabolic process                                  | 115.7493404 | 0.034557432 | 0.149248041 |
| GO:0006037 | cell wall chitin metabolic process                        | 115.7493404 | 0.034557432 | 0.149248041 |
| GO:0006948 | fusion                                                    | 115.7493404 | 0.034557432 | 0.149248041 |
| GO:0007063 | cohesion                                                  | 115.7493404 | 0.034557432 | 0.149248041 |
| GO:0007387 | formation                                                 | 115.7493404 | 0.034557432 | 0.149248041 |
| GO:0007388 | posterior compartment specification                       | 115.7493404 | 0.034557432 | 0.149248041 |
| GO:0009181 | catabolic process                                         | 115.7493404 | 0.034557432 | 0.149248041 |
| GO:0010255 | glucose mediated signaling pathway                        | 115.7493404 | 0.034557432 | 0.149248041 |
| GO:0010752 | signaling                                                 | 115.7493404 | 0.034557432 | 0.149248041 |
| GO:0010758 | chemotaxis                                                | 115.7493404 | 0.034557432 | 0.149248041 |
| GO:0010813 | neuropeptide catabolic process                            | 115.7493404 | 0.034557432 | 0.149248041 |
| GO:0010814 | substance P catabolic process                             | 115.7493404 | 0.034557432 | 0.149248041 |
| GO:0010816 | calcitonin catabolic process                              | 115.7493404 | 0.034557432 | 0.149248041 |
| GO:0010900 | phosphatidylcholine catabolic process                     | 115.7493404 | 0.034557432 | 0.149248041 |
| GO:0014013 | regulation of gliogenesis                                 | 115.7493404 | 0.034557432 | 0.149248041 |
| GO:0014812 | muscle cell migration                                     | 115.7493404 | 0.034557432 | 0.149248041 |
| GO:0014856 | skeletal muscle cell proliferation                        | 115.7493404 | 0.034557432 | 0.149248041 |
| GO:0019637 | organophosphate metabolic process                         | 115.7493404 | 0.034557432 | 0.149248041 |
| GO:0019883 | antigen processing and presentation of endogenous antigen | 115.7493404 | 0.034557432 | 0.149248041 |
| GO:0021629 | organization                                              | 115.7493404 | 0.034557432 | 0.149248041 |
| GO:0021692 | morphogenesis                                             | 115.7493404 | 0.034557432 | 0.149248041 |
| GO:0021793 | axon                                                      | 115.7493404 | 0.034557432 | 0.149248041 |
| GO:0030322 | stabilization of membrane potential                       | 115.7493404 | 0.034557432 | 0.149248041 |
| GO:0030421 | defecation                                                | 115.7493404 | 0.034557432 | 0.149248041 |
| GO:0030826 | process                                                   | 115.7493404 | 0.034557432 | 0.149248041 |
| GO:0031052 | chromosome breakage                                       | 115.7493404 | 0.034557432 | 0.149248041 |
| GO:0031645 | system process                                            | 115.7493404 | 0.034557432 | 0.149248041 |
| GO:0032244 | transport                                                 | 115.7493404 | 0.034557432 | 0.149248041 |
| GO:0032498 | detection of muramyl dipeptide                            | 115.7493404 | 0.034557432 | 0.149248041 |
| GO:0032655 | production                                                | 115.7493404 | 0.034557432 | 0.149248041 |
| GO:0032701 | production                                                | 115.7493404 | 0.034557432 | 0.149248041 |
| GO:0032814 | activation                                                | 115.7493404 | 0.034557432 | 0.149248041 |
| GO:0032900 | production                                                | 115.7493404 | 0.034557432 | 0.149248041 |
| GO:0032960 | biosynthetic process                                      | 115.7493404 | 0.034557432 | 0.149248041 |
| GO:0034120 | aggregation                                               | 115.7493404 | 0.034557432 | 0.149248041 |
| GO:0034230 | enkephalin processing                                     | 115.7493404 | 0.034557432 | 0.149248041 |
| GO:0034231 | islet amyloid polypeptide processing                      | 115.7493404 | 0.034557432 | 0.149248041 |
| GO:0034369 | remodeling                                                | 115.7493404 | 0.034557432 | 0.149248041 |
| GO:0034959 | endothelin maturation                                     | 115.7493404 | 0.034557432 | 0.149248041 |
| GO:0035476 | angioblast cell migration                                 | 115.7493404 | 0.034557432 | 0.149248041 |
| GO:0035691 | macrophage migration inhibitory factor signaling pathway  | 115.7493404 | 0.034557432 | 0.149248041 |
| GO:0035978 | histone H2A-S139 phosphorylation                          | 115.7493404 | 0.034557432 | 0.149248041 |
| GO:0040040 | thermosensory behavior                                    | 115.7493404 | 0.034557432 | 0.149248041 |
| GO:0042228 | interleukin-8 biosynthetic process                        | 115.7493404 | 0.034557432 | 0.149248041 |

|            |                                                                                                 |             |             |             |
|------------|-------------------------------------------------------------------------------------------------|-------------|-------------|-------------|
| GO:0042976 | activation of Janus kinase activity                                                             | 115.7493404 | 0.034557432 | 0.149248041 |
| GO:0045234 | protein palmitoylation                                                                          | 115.7493404 | 0.034557432 | 0.149248041 |
| GO:0045368 | biosynthetic process                                                                            | 115.7493404 | 0.034557432 | 0.149248041 |
| GO:0045605 | differentiation                                                                                 | 115.7493404 | 0.034557432 | 0.149248041 |
| GO:0045622 | differentiation                                                                                 | 115.7493404 | 0.034557432 | 0.149248041 |
| GO:0045624 | differentiation                                                                                 | 115.7493404 | 0.034557432 | 0.149248041 |
| GO:0045769 | cell division                                                                                   | 115.7493404 | 0.034557432 | 0.149248041 |
| GO:0045870 | genome replication                                                                              | 115.7493404 | 0.034557432 | 0.149248041 |
| GO:0046588 | negative regulation of calcium-dependent cell-cell adhesion                                     | 115.7493404 | 0.034557432 | 0.149248041 |
| GO:0046645 | T cell activation                                                                               | 115.7493404 | 0.034557432 | 0.149248041 |
| GO:0048242 | epinephrine secretion                                                                           | 115.7493404 | 0.034557432 | 0.149248041 |
| GO:0050923 | regulation of negative chemotaxis                                                               | 115.7493404 | 0.034557432 | 0.149248041 |
| GO:0051153 | differentiation                                                                                 | 115.7493404 | 0.034557432 | 0.149248041 |
| GO:0051494 | organization                                                                                    | 115.7493404 | 0.034557432 | 0.149248041 |
| GO:0051939 | gamma-aminobutyric acid import                                                                  | 115.7493404 | 0.034557432 | 0.149248041 |
| GO:0060138 | fetal process involved in parturition                                                           | 115.7493404 | 0.034557432 | 0.149248041 |
| GO:0060405 | regulation of penile erection                                                                   | 115.7493404 | 0.034557432 | 0.149248041 |
| GO:0060448 | dichotomous subdivision of terminal units involved in lung branching                            | 115.7493404 | 0.034557432 | 0.149248041 |
| GO:0060721 | cell proliferation                                                                              | 115.7493404 | 0.034557432 | 0.149248041 |
| GO:0060739 | signaling involved in prostate gland development                                                | 115.7493404 | 0.034557432 | 0.149248041 |
| GO:0060809 | mesodermal to mesenchymal transition involved in gastrulation                                   | 115.7493404 | 0.034557432 | 0.149248041 |
| GO:0060857 | barrier                                                                                         | 115.7493404 | 0.034557432 | 0.149248041 |
| GO:0061143 | development                                                                                     | 115.7493404 | 0.034557432 | 0.149248041 |
| GO:0070092 | regulation of glucagon secretion                                                                | 115.7493404 | 0.034557432 | 0.149248041 |
| GO:0070247 | apoptotic process                                                                               | 115.7493404 | 0.034557432 | 0.149248041 |
| GO:0070254 | mucus secretion                                                                                 | 115.7493404 | 0.034557432 | 0.149248041 |
| GO:0070734 | histone H3-K27 methylation                                                                      | 115.7493404 | 0.034557432 | 0.149248041 |
| GO:0071105 | response to interleukin-11                                                                      | 115.7493404 | 0.034557432 | 0.149248041 |
| GO:0071107 | stimulus                                                                                        | 115.7493404 | 0.034557432 | 0.149248041 |
| GO:0071336 | proliferation                                                                                   | 115.7493404 | 0.034557432 | 0.149248041 |
| GO:0071608 | alpha production                                                                                | 115.7493404 | 0.034557432 | 0.149248041 |
| GO:0071939 | vitamin A import                                                                                | 115.7493404 | 0.034557432 | 0.149248041 |
| GO:0072675 | osteoclast fusion                                                                               | 115.7493404 | 0.034557432 | 0.149248041 |
| GO:0090287 | growth factor stimulus                                                                          | 115.7493404 | 0.034557432 | 0.149248041 |
| GO:1900275 | phospholipase C activity                                                                        | 115.7493404 | 0.034557432 | 0.149248041 |
| GO:1900276 | receptor activity                                                                               | 115.7493404 | 0.034557432 | 0.149248041 |
| GO:1900737 | phospholipase C-activating G-protein coupled receptor signaling involved in ubiquitin-dependent | 115.7493404 | 0.034557432 | 0.149248041 |
| GO:2000058 | protein catabolic process                                                                       | 115.7493404 | 0.034557432 | 0.149248041 |
| GO:2000097 | matrix adhesion                                                                                 | 115.7493404 | 0.034557432 | 0.149248041 |
| GO:2000169 | nitrosylation                                                                                   | 115.7493404 | 0.034557432 | 0.149248041 |
| GO:2000193 | transport                                                                                       | 115.7493404 | 0.034557432 | 0.149248041 |
| GO:2000363 | E synthase activity                                                                             | 115.7493404 | 0.034557432 | 0.149248041 |



|            |                                       |             |             |             |
|------------|---------------------------------------|-------------|-------------|-------------|
| GO:2000685 | response to X-ray                     | 115.7493404 | 0.034557432 | 0.149248041 |
|            | positive regulation of N-terminal     |             |             |             |
| GO:2000761 | peptidyl-lysine acetylation           | 115.7493404 | 0.034557432 | 0.149248041 |
| GO:2000872 | secretion                             | 115.7493404 | 0.034557432 | 0.149248041 |
|            | break repair via nonhomologous end    |             |             |             |
| GO:2001033 | joining                               | 115.7493404 | 0.034557432 | 0.149248041 |
| GO:0035335 | peptidyl-tyrosine dephosphorylation   | 7.086694308 | 0.035144613 | 0.151345297 |
| GO:0010923 | activity                              | 6.944960422 | 0.037152263 | 0.156896795 |
| GO:0016486 | peptide hormone processing            | 13.61756946 | 0.037168826 | 0.156896795 |
| GO:0031290 | retinal ganglion cell axon guidance   | 13.61756946 | 0.037168826 | 0.156896795 |
| GO:0045777 | positive regulation of blood pressure | 13.61756946 | 0.037168826 | 0.156896795 |
| GO:0048265 | response to pain                      | 13.61756946 | 0.037168826 | 0.156896795 |
| GO:0050718 | beta secretion                        | 13.61756946 | 0.037168826 | 0.156896795 |
| GO:0048011 | signaling pathway                     | 3.012064619 | 0.037170852 | 0.156896795 |
| GO:0051289 | protein homotetramerization           | 6.808784728 | 0.039225621 | 0.164637113 |
|            | positive regulation of canonical Wnt  |             |             |             |
| GO:0090263 | receptor signaling pathway            | 6.808784728 | 0.039225621 | 0.164637113 |
| GO:0007269 | neurotransmitter secretion            | 6.67784656  | 0.041365088 | 0.172086316 |
| GO:0006691 | leukotriene metabolic process         | 12.86103782 | 0.041577902 | 0.172086316 |
| GO:0007214 | pathway                               | 12.86103782 | 0.041577902 | 0.172086316 |
| GO:0045926 | negative regulation of growth         | 12.86103782 | 0.041577902 | 0.172086316 |
| GO:0048863 | stem cell differentiation             | 12.86103782 | 0.041577902 | 0.172086316 |
| GO:0000902 | cell morphogenesis                    | 6.551849455 | 0.04357104  | 0.178845316 |
| GO:0043627 | response to estrogen stimulus         | 6.551849455 | 0.04357104  | 0.178845316 |
| GO:0046330 | positive regulation of JNK cascade    | 6.551849455 | 0.04357104  | 0.178845316 |
| GO:0001666 | response to hypoxia                   | 3.733849689 | 0.045678024 | 0.186978726 |
| GO:0051403 | stress-activated MAPK cascade         | 6.430518909 | 0.045843828 | 0.187143297 |
| GO:0070328 | triglyceride homeostasis              | 12.18414109 | 0.0462062   | 0.188107207 |
| GO:0006810 | transport                             | 2.645699208 | 0.0467989   | 0.190000985 |
| GO:0042742 | defense response to bacterium         | 4.539189818 | 0.048021019 | 0.194432929 |

---
