# Supplementary material for: Comprehensive analysis of long noncoding RNA–mRNA co-expression patterns in thyroid cancer
Source: Royal Society of Chemistry journal article supplement (doi:10.1039/c7mb00375g), 2017-08-04
Supplement: c7mb00375g1.zip [file c7mb00375g1.zip]

---

**Comprehensive analysis of long non-coding RNA-mRNA co-expression patterns in thyroid cancer**

Yaying Du, Wenfei Xia, Jinjun Zhang, Dongyi Wan, Zhifang Yang\* and Xingrui Li\*

**Supplementary Table 6:**Five lncRNAs co-expreesion analysis by Spearman rank correlation

| Correlation        |                             | RP5-1024C24.1 | AC007255.8 | HOXD-<br>AS1 | RP11-<br>402L6.1 |
|--------------------|-----------------------------|---------------|------------|--------------|------------------|
| CTD-<br>3193O13.11 | coefficient                 | 0.267         | 0.611      | 0.687        | 0.621            |
|                    | Significance<br>(bilateral) | 0.177         | 0.001**    | <0.001**     | 0.001**          |

**Notes:** \* \*  $P < 0.01$ .
