# Supplementary material for: Comprehensive analysis of long noncoding RNA–mRNA co-expression patterns in thyroid cancer
Source: Royal Society of Chemistry journal article supplement (doi:10.1039/c7mb00375g), 2017-08-04
Supplement: c7mb00375g1.zip [file c7mb00375g1.zip]

# Comprehensive analysis of long non-coding RNA-mRNA co-expression patterns in thyroid cancer

Yaying Du, Wenfei Xia, Jinjun Zhang, Dongyi Wan, Zhifang Yang\* and Xingrui Li\*

**Supplementary Table 4:** KEGG pathway analysis for 452 mRNAs

| path_name                                              | enrichment  | pvalue      | FDR         |
|--------------------------------------------------------|-------------|-------------|-------------|
| Cell adhesion molecules (CAMs)                         | 11.89205552 | 1.28788E-11 | 2.25379E-09 |
| ECM-receptor interaction                               | 13.30452188 | 1.82453E-08 | 1.59646E-06 |
| Viral myocarditis                                      | 14.07762248 | 6.57514E-08 | 3.8355E-06  |
| Focal adhesion                                         | 7.304570023 | 1.42597E-07 | 6.23861E-06 |
| Antigen processing and presentation                    | 11.29261857 | 2.35497E-06 | 8.24238E-05 |
| Allograft rejection                                    | 16.93892786 | 5.5686E-06  | 0.000162418 |
| Graft-versus-host disease                              | 15.43324538 | 9.79788E-06 | 0.000244947 |
| Type I diabetes mellitus                               | 14.77651154 | 1.27299E-05 | 0.000278466 |
| Transcriptional misregulation in cancer                | 6.430518909 | 1.71075E-05 | 0.000332645 |
| Autoimmune thyroid disease                             | 12.40171504 | 3.60548E-05 | 0.00063096  |
| Phagosome                                              | 6.593316856 | 4.22317E-05 | 0.000671868 |
| Protein digestion and absorption                       | 9.207333893 | 4.73314E-05 | 0.00069025  |
| HTLV-I infection                                       | 4.750905761 | 0.000100183 | 0.001348617 |
| Leukocyte transendothelial migration                   | 6.866486293 | 0.000315085 | 0.003938567 |
| Hematopoietic cell lineage                             | 7.89200048  | 0.000477219 | 0.005567558 |
| PI3K-Akt signaling pathway                             | 3.669287447 | 0.000986766 | 0.010257207 |
| Herpes simplex infection                               | 4.925503846 | 0.000996414 | 0.010257207 |
| p53 signaling pathway                                  | 8.51098091  | 0.001250733 | 0.012159905 |
| Complement and coagulation cascades                    | 8.38763336  | 0.001338983 | 0.012332739 |
| Amoebiasis                                             | 6.371523323 | 0.00153239  | 0.013408409 |
| Viral carcinogenesis                                   | 4.473404459 | 0.001895761 | 0.015798007 |
| Neuroactive ligand-receptor interaction                | 3.78816023  | 0.002839507 | 0.022586991 |
| Cell cycle                                             | 5.600774534 | 0.003033313 | 0.023079555 |
| Amino sugar and nucleotide sugar metabolism            | 9.448925744 | 0.003419199 | 0.024226104 |
| Proteoglycans in cancer                                | 4.079271907 | 0.003460872 | 0.024226104 |
| Axon guidance                                          | 5.301496505 | 0.004037042 | 0.027172396 |
| GABAergic synapse                                      | 6.430518909 | 0.004517887 | 0.029282599 |
| Morphine addiction                                     | 6.223082816 | 0.005231377 | 0.032696107 |
| Staphylococcus aureus infection                        | 7.847412906 | 0.006864094 | 0.041421256 |
| Pathways in cancer                                     | 3.185761662 | 0.009352643 | 0.054557085 |
| Asthma                                                 | 10.21317709 | 0.012554493 | 0.070872136 |
| Arrhythmogenic right ventricular cardiomyopathy (ARVC) | 6.173298153 | 0.016456814 | 0.0899982   |
| Toxoplasmosis                                          | 4.743825425 | 0.017040088 | 0.090364105 |
| Calcium signaling pathway                              | 3.79506034  | 0.021388541 | 0.109763755 |
| Tuberculosis                                           | 3.774435012 | 0.021952751 | 0.109763755 |
| Small cell lung cancer                                 | 5.38369025  | 0.026705502 | 0.129818411 |
| Natural killer cell mediated cytotoxicity              | 4.133905013 | 0.030248067 | 0.143065183 |
| Epstein-Barr virus infection                           | 3.404392364 | 0.035663228 | 0.163111337 |
| Rheumatoid arthritis                                   | 4.925503846 | 0.036350526 | 0.163111337 |
| Intestinal immune network for IgA production           | 6.808784728 | 0.039225621 | 0.171612091 |
| Metabolic pathways                                     | 1.849653042 | 0.04048577  | 0.172805116 |
| Regulation of actin cytoskeleton                       | 3.23021415  | 0.045384567 | 0.186573718 |
| Non-small cell lung cancer                             | 6.430518909 | 0.045843828 | 0.186573718 |

|                                                        |             |             |             |
|--------------------------------------------------------|-------------|-------------|-------------|
| Pathogenic Escherichia coli infection                  | 6.313600384 | 0.048183776 | 0.19164002  |
| Retrograde endocannabinoid signaling                   | 4.495120014 | 0.049629294 | 0.193002809 |
| Mineral absorption                                     | 36.86470588 | 0.000306759 | 0.021473106 |
| Arrhythmogenic right ventricular cardiomyopathy (ARVC) | 25.068      | 0.000967769 | 0.032655287 |
| Hypertrophic cardiomyopathy (HCM)                      | 22.11882353 | 0.001399512 | 0.032655287 |
| Nicotinate and nicotinamide metabolism                 | 44.76428571 | 0.003694321 | 0.06465062  |
| Transcriptional misregulation in cancer                | 10.445      | 0.012156889 | 0.170196439 |
| Retinol metabolism                                     | 18.43235294 | 0.0213662   | 0.203315802 |
| Complement and coagulation cascades                    | 18.16521739 | 0.021981428 | 0.203315802 |
| Adipocytokine signaling pathway                        | 17.65352113 | 0.023236092 | 0.203315802 |
| TGF-beta signaling pathway                             | 15.47407407 | 0.029986706 | 0.233229933 |
| Dilated cardiomyopathy                                 | 13.77362637 | 0.037513698 | 0.242744456 |
| Vitamin B6 metabolism                                  | 104.45      | 0.038145557 | 0.242744456 |
| Metabolic pathways                                     | 3.162489487 | 0.047123523 | 0.274887216 |

---
