# Supplementary material for: Comprehensive analysis of long noncoding RNA–mRNA co-expression patterns in thyroid cancer
Source: Royal Society of Chemistry journal article supplement (doi:10.1039/c7mb00375g), 2017-08-04
Supplement: c7mb00375g1.zip [file c7mb00375g1.zip]

**Comprehensive analysis of long non-coding RNA-mRNA co-expression patterns in thyroid cancer**

Yaying Du, Wenfei Xia, Jinjun Zhang, Dongyi Wan, Zhifang Yang\* and Xingrui Li\*

**Supplementary Table 10:** qPCR primers for 20 novel lncRNAs

| LncRNAs name           | Forward                   | Reverse                |
|------------------------|---------------------------|------------------------|
| CTD-2020K17.1          | GGCACATCTTCTCCGCACCG      | GCTGGCTCCTTCCAGGGTCTT  |
| AC007255.8             | GTGGGCTCCGCTGGGTAAA       | CGCCTGAAACTCGCAAACA    |
| HOXD-AS1               | AGAAGGTGGCAGATTGGTC       | CATTGCGGCTTAGGGTTT     |
| ADAMTS9-AS1            | AAACAAAGGCACGAAACAC       | ACCTCAGGCAACAGGACAT    |
| AC008063.2             | CAGTTTCCGTAGGAGGGTCG      | GCCGCATAGAGTAGCCATTAA  |
| RP11-402L6.1           | TACCCTATTTCTTAACACTCA     | CATTATTAGCATTGCCTTCA   |
| LRP4-AS1               | ACCCACTAACACCATCTTTCC     | ATACCATTGAGGCGTCCAG    |
| RP11-473M20.5          | CTCGCCCTCATTCTCCTGCTA     | CTGTTACCTCGCCCTGTCCTG  |
| RP11-5407.3            | TGACGGTGTATGTGCTGGGATG    | GGGCAGGTGGTAGGAGTGGAAG |
| RP1-244F24.1           | TCCACTCCCTCCTGCAATT       | CCTCTAGGCTTCGGAAACTG   |
| RP11-465L10.10         | TGCGGCCTCTACCTTTGACGT     | TGTGCGATCCCGGACCTTGC   |
| RP11-638I2.8           | AAGTTTATTTACTCTACTGGGTGAC | CAGGATGTATTTAACGTGCC   |
| RP5-1024C24.1          | AAGAAGCCAACTACAAATGAG     | CTGCGTGACTAGGAAGAAGAC  |
| CTD-3193O13.11         | ATGGCGAAGGTGGTGCTTG       | CACCTCCTGCTTCCCTGACC   |
| RP11-16K12.1           | ACCTGAAAGAGGGAAGACGG      | TGTGGACTGTGCTTGTGGG    |
| RPSAP52                | AGCACCAGTGGGCACATCG       | GGACATCCTCCTTCATTT     |
| AC063976.7             | GTCTACTCAGCCTCTTGGTCC     | GTCCCTGTTGGCATTGTCT    |
| XXbac-<br>BPG248L24.12 | CCACGTAGCCCACTGAGATGAAG   | TGCGGGTCGGGAGGGAAAT    |
| RP11-369K16.1          | TGATGGCAGGTCAAATGGT       | ATGAAACTGGATGGCAAGG    |
| HOXD1-downstream       | GTTGGTGAGGAGGCTGGGAGA     | TGGGATGGCGTCGTTGCTG    |
| GAPDH                  | ACCACAGTCCATGCCATCAC      | TCCACCACCCTGTTGCTGTA   |
