# Supplementary material for: Comprehensive analysis of long noncoding RNA–mRNA co-expression patterns in thyroid cancer
Source: Royal Society of Chemistry journal article supplement (doi:10.1039/c7mb00375g), 2017-08-04
Supplement: c7mb00375g1.zip [file c7mb00375g1.zip]

Comprehensive analysis of long non-coding RNA-mRNA co-expression patterns in thyroid cancer

Yaying Du, Wenfei Xia, Jinjun Zhang, Dongyi Wan, Zhifang Yang\* and Xingrui Li\*

**Supplementary Table 1:** 240 unannotated lncRNAs

| test_id     | lncRNA_name    | chr   | length | log2FC   | style | p_value  |
|-------------|----------------|-------|--------|----------|-------|----------|
| XLOC_023611 | RP11-353N14.2  | chr17 | 14655  | -4.57161 | up    | 5.00E-05 |
| XLOC_014586 | LINC00284      | chr13 | 124359 | -3.89777 | up    | 5.00E-05 |
| XLOC_024502 | CTD-2020K17.1  | chr17 | 31292  | -3.2117  | up    | 5.00E-05 |
| XLOC_034456 | FER1L4         | chr20 | 49922  | -3.19175 | up    | 5.00E-05 |
| XLOC_002885 | ESPNP          | chr1  | 39000  | -2.90551 | up    | 5.00E-05 |
| XLOC_049543 | AC004540.5     | chr7  | 103385 | -2.87451 | up    | 5.00E-05 |
| XLOC_039844 | LINC00887      | chr3  | 49743  | -2.87258 | up    | 5.00E-05 |
| XLOC_013785 | RP11-1016B18.1 | chr12 | 361377 | -2.63519 | up    | 5.00E-05 |
| XLOC_015138 | LINC00457      | chr13 | 207318 | N/A      | up    | 5.00E-05 |
| XLOC_050989 | AC007255.8     | chr7  | 49446  | -5.99376 | up    | 0.0001   |
| XLOC_013298 | RP11-469H8.6   | chr12 | 11801  | -3.12483 | up    | 0.0001   |
| XLOC_021558 | AC002331.1     | chr16 | 59147  | -2.72717 | up    | 0.0001   |
| XLOC_039586 | IL12A-AS1      | chr3  | 314411 | -4.14308 | up    | 0.0002   |
| XLOC_027450 | SIGLEC17P      | chr19 | 6359   | -3.38566 | up    | 0.0002   |
| XLOC_029726 | ANKRD36BP2     | chr2  | 40803  | -2.60998 | up    | 0.0002   |
| XLOC_029324 | CYP1B1-AS1     | chr2  | 106207 | -2.04381 | up    | 0.0002   |
| XLOC_020365 | ABCC6P1        | chr16 | 27340  | -3.02179 | up    | 0.00025  |
| XLOC_042397 | RP11-362F19.1  | chr4  | 30886  | 2.46926  | down  | 0.00025  |
| XLOC_019933 | RP11-66B24.4   | chr15 | 26896  | -3.25838 | up    | 0.0003   |
| XLOC_050657 | LINC00996      | chr7  | 16877  | -3.58194 | up    | 0.00035  |
| XLOC_046405 | HCG22          | chr6  | 10735  | -3.48789 | up    | 0.00035  |
| XLOC_003886 | RP4-663N10.2   | chr1  | 53993  | -5.21654 | up    | 0.0004   |
| XLOC_032769 | LINC00607      | chr2  | 232739 | -2.53671 | up    | 0.0004   |
| XLOC_060271 | AC010970.2     | chrY  | 599    | N/A      | up    | 0.0004   |
| XLOC_035157 | ITGB2-AS1      | chr21 | 8717   | -3.19737 | up    | 0.00045  |
| XLOC_013180 | RP11-476D10.1  | chr12 | 23660  | -8.24353 | up    | 0.0005   |
| XLOC_040810 | RP11-115D19.1  | chr4  | 175148 | -4.4288  | up    | 0.0006   |
| XLOC_036167 | CTA-126B4.7    | chr22 | 13076  | -2.73381 | up    | 0.00065  |
| XLOC_013554 | RP11-230G5.2   | chr12 | 176006 | -5.41361 | up    | 0.0008   |
| XLOC_013219 | PLEKHA8P1      | chr12 | 43233  | -2.03435 | up    | 0.0008   |
| XLOC_058486 | LINC00086      | chrX  | 6553   | -1.86655 | up    | 0.0008   |
| XLOC_011934 | RP11-923I11.5  | chr12 | 8598   | -3.7956  | up    | 0.0009   |
| XLOC_032490 | HOXD-AS1       | chr2  | 15943  | -3.30042 | up    | 0.0009   |
| XLOC_030193 | AC068492.1     | chr2  | 622    | N/A      | up    | 0.0009   |
| XLOC_048200 | RP3-525N10.2   | chr6  | 5407   | -2.46565 | up    | 0.00095  |
| XLOC_054459 | RP11-44N11.2   | chr8  | 3649   | -5.69683 | up    | 0.001    |

|             |                |       |        |          |      |         |
|-------------|----------------|-------|--------|----------|------|---------|
| XLOC_048890 | RP11-417E7.2   | chr6  | 12886  | -2.83455 | up   | 0.00115 |
| XLOC_002684 | RP11-547D24.1  | chr1  | 6025   | -3.31609 | up   | 0.00125 |
| XLOC_001687 | RP11-85G21.3   | chr1  | 14928  | -6.72142 | up   | 0.0013  |
| XLOC_011791 | AC079630.2     | chr12 | 39193  | -7.58859 | up   | 0.00135 |
| XLOC_018615 | RP11-279F6.3   | chr15 | 112072 | -3.36137 | up   | 0.0014  |
| XLOC_018253 | RP11-1008C21.1 | chr15 | 77575  | -3.6009  | up   | 0.00145 |
| XLOC_024846 | LINC00511      | chr17 | 317348 | -2.56346 | up   | 0.00145 |
| XLOC_024617 | RP11-893F2.9   | chr17 | 6369   | -5.15897 | up   | 0.00165 |
| XLOC_056035 | RP11-125B21.2  | chr9  | 219870 | 1.78303  | down | 0.00165 |
| XLOC_023040 | RP5-1028K7.2   | chr17 | 10061  | -3.69634 | up   | 0.0017  |
| XLOC_009440 | RP11-136I14.5  | chr11 | 30395  | N/A      | up   | 0.0019  |
| XLOC_037179 | RP11-761N21.1  | chr3  | 114366 | -5.6164  | up   | 0.0019  |
| XLOC_002237 | MIR205HG       | chr1  | 4019   | -2.27901 | up   | 0.00195 |
| XLOC_024301 | YWHAEP7        | chr17 | 64626  | -2.08105 | up   | 0.0021  |
| XLOC_046196 | CASC15         | chr6  | 549732 | -1.56346 | up   | 0.00225 |
| XLOC_017616 | AL132709.1     | chr14 | 5073   | N/A      | up   | 0.0023  |
| XLOC_012735 | RP11-638F5.1   | chr12 | 53191  | 2.77192  | down | 0.0024  |
| XLOC_000853 | RP1-158P9.1    | chr1  | 35590  | -5.30022 | up   | 0.00245 |
| XLOC_039711 | RP11-385J1.2   | chr3  | 333901 | -3.41036 | up   | 0.00245 |
| XLOC_011432 | RP5-1063M23.2  | chr12 | 25516  | -2.05114 | up   | 0.00245 |
| XLOC_015112 | LINC00426      | chr13 | 37026  | -1.32445 | up   | 0.00255 |
| XLOC_012151 | RP11-221N13.3  | chr12 | 16521  | -4.01995 | up   | 0.00265 |
| XLOC_037409 | ADAMTS9-AS1    | chr3  | 26865  | -2.04318 | up   | 0.00265 |
| XLOC_002671 | RP4-758J18.10  | chr1  | 7348   | -3.05168 | up   | 0.00285 |
| XLOC_047710 | GUSBP2         | chr6  | 85422  | -2.25003 | up   | 0.0029  |
| XLOC_001312 | TCEB1P20       | chr1  | 58053  | -7.28756 | up   | 0.00335 |
| XLOC_042677 | RP11-290F5.1   | chr4  | 17486  | -2.10513 | up   | 0.00335 |
| XLOC_013556 | RPSAP52        | chr12 | 70838  | -5.03336 | up   | 0.0034  |
| XLOC_027886 | EMR4P          | chr19 | 45399  | -2.983   | up   | 0.00365 |
| XLOC_049477 | AC098592.8     | chr7  | 105077 | -1.92375 | up   | 0.0038  |
| XLOC_014143 | LRCOL1         | chr12 | 7470   | -1.81897 | up   | 0.00385 |
| XLOC_019715 | RP11-2E17.1    | chr15 | 59532  | -5.11721 | up   | 0.0039  |
| XLOC_009246 | GAPDHP70       | chr11 | 90642  | -2.24547 | up   | 0.00395 |
| XLOC_010991 | LINC00900      | chr11 | 7353   | -1.74728 | up   | 0.00425 |
| XLOC_030838 | AC010980.2     | chr2  | 37345  | 1.93256  | down | 0.00425 |
| XLOC_057912 | SSX8           | chrX  | 21021  | -4.89222 | up   | 0.0044  |
| XLOC_006819 | SFTA1P         | chr10 | 10724  | -1.99394 | up   | 0.00485 |
| XLOC_000032 | RP11-465B22.3  | chr1  | 10445  | -1.82217 | up   | 0.005   |
| XLOC_030323 | AC008063.2     | chr2  | 4036   | -5.4783  | up   | 0.00515 |
| XLOC_039346 | RP11-402L6.1   | chr3  | 13340  | -7.50461 | up   | 0.0052  |
| XLOC_001553 | AL450992.2     | chr1  | 14818  | -2.19763 | up   | 0.0053  |
| XLOC_043151 | LINC01021      | chr5  | 24278  | -1.74739 | up   | 0.0053  |
| XLOC_007536 | ENTPD1-AS1     | chr10 | 337033 | -2.30999 | up   | 0.0055  |
| XLOC_038014 | RP11-64D22.2   | chr3  | 20915  | 2.38247  | down | 0.0055  |
| XLOC_008628 | LRP4-AS1       | chr11 | 27985  | -5.60336 | up   | 0.00555 |

|             |                |       |        |          |      |         |
|-------------|----------------|-------|--------|----------|------|---------|
| XLOC_050067 | RP11-115N4.1   | chr7  | 204042 | -2.36592 | up   | 0.00555 |
| XLOC_033761 | BPIFB9P        | chr20 | 11241  | -4.68018 | up   | 0.00575 |
| XLOC_020211 | RP11-473M20.5  | chr16 | 6662   | -2.15071 | up   | 0.00585 |
| XLOC_041858 | RP11-707A18.1  | chr4  | 110218 | 2.45566  | down | 0.0059  |
| XLOC_002649 | RP11-54O7.3    | chr1  | 8899   | -2.62043 | up   | 0.0063  |
| XLOC_027974 | ILF3-AS1       | chr19 | 2154   | 1.10976  | down | 0.0063  |
| XLOC_043565 | CTD-2269F5.1   | chr5  | 106339 | -3.221   | up   | 0.0066  |
| XLOC_048544 | RP11-624M8.1   | chr6  | 173914 | -3.04916 | up   | 0.0067  |
| XLOC_054556 | RP11-238K6.1   | chr8  | 274127 | 2.54785  | down | 0.00675 |
| XLOC_044702 | RP11-53O19.1   | chr5  | 66558  | 1.19478  | down | 0.0071  |
| XLOC_006489 | CYP17A1-AS1    | chr10 | 3666   | 2.03788  | down | 0.0076  |
| XLOC_048061 | RP1-244F24.1   | chr6  | 4577   | -5.81609 | up   | 0.00775 |
| XLOC_037629 | RP11-861A13.4  | chr3  | 13834  | -2.93591 | up   | 0.0082  |
| XLOC_016732 | MEG9           | chr14 | 4036   | -4.46766 | up   | 0.0083  |
| XLOC_046467 | HLA-DPB2       | chr6  | 22215  | -4.09349 | up   | 0.00835 |
| XLOC_019163 | TMCO5B         | chr15 | 12070  | 2.82269  | down | 0.00855 |
| XLOC_024481 | AC003102.3     | chr17 | 24095  | -2.02251 | up   | 0.009   |
| XLOC_016397 | RAP1AP         | chr14 | 451    | -3.12655 | up   | 0.00905 |
| XLOC_034580 | RP11-465L10.10 | chr20 | 8572   | -3.84642 | up   | 0.0094  |
| XLOC_013586 | RP11-81H14.2   | chr12 | 118975 | -1.61673 | up   | 0.0095  |
| XLOC_039843 | RP11-513G11.2  | chr3  | 25749  | -3.68028 | up   | 0.00965 |
| XLOC_043855 | AC063976.7     | chr5  | 4032   | -3.02906 | up   | 0.00985 |
| XLOC_001816 | RP11-541H12.1  | chr1  | 11036  | -7.52789 | up   | 0.00995 |
| XLOC_016908 | AE000662.93    | chr14 | 752    | N/A      | up   | 0.01035 |
| XLOC_036809 | CTA-384D8.35   | chr22 | 12028  | -3.58253 | up   | 0.01165 |
| XLOC_029912 | AC104655.3     | chr2  | 5008   | -2.72488 | up   | 0.01305 |
| XLOC_003152 | RP4-728D4.2    | chr1  | 10785  | -2.6006  | up   | 0.0131  |
| XLOC_040729 | LINC01094      | chr4  | 39605  | -1.59779 | up   | 0.0133  |
| XLOC_049334 | AC093627.11    | chr7  | 9139   | -1.9898  | up   | 0.01345 |
| XLOC_040734 | LINC01088      | chr4  | 337249 | 1.4839   | down | 0.01365 |
| XLOC_018961 | RP11-168G16.2  | chr15 | 67792  | -3.70475 | up   | 0.01375 |
| XLOC_036351 | PI4KAP1        | chr22 | 46285  | -1.53053 | up   | 0.01395 |
| XLOC_058268 | RP6-24A23.3    | chrX  | 3649   | 1.80885  | down | 0.01405 |
| XLOC_022180 | RP11-118F19.1  | chr16 | 5363   | 2.37865  | down | 0.0141  |
| XLOC_057780 | RP11-245M24.1  | chrX  | 124815 | -5.61113 | up   | 0.01425 |
| XLOC_037574 | LINC00973      | chr3  | 17773  | -2.334   | up   | 0.0143  |
| XLOC_016612 | RP11-638I2.8   | chr14 | 20272  | -2.75109 | up   | 0.0144  |
| XLOC_013705 | MKRN9P         | chr12 | 5601   | -6.10441 | up   | 0.0146  |
| XLOC_024774 | RP11-214C8.2   | chr17 | 7305   | -1.78439 | up   | 0.0147  |
| XLOC_045479 | CTC-255N20.1   | chr5  | 61856  | -2.28198 | up   | 0.01475 |
| XLOC_056716 | VN1R51P        | chr9  | 47163  | 2.33709  | down | 0.01485 |
| XLOC_021628 | RP11-455F5.5   | chr16 | 1453   | -2.13223 | up   | 0.0151  |
| XLOC_046511 | RP3-340B19.3   | chr6  | 59946  | 1.88682  | down | 0.0158  |
| XLOC_000259 | U1             | chr1  | 3148   | -2.96941 | up   | 0.0159  |
| XLOC_025219 | RP11-838N2.4   | chr18 | 13110  | -2.37344 | up   | 0.01605 |

|             |                |       |        |          |      |         |
|-------------|----------------|-------|--------|----------|------|---------|
| XLOC_014845 | LINC00359      | chr13 | 13534  | -2.6889  | up   | 0.01645 |
| XLOC_032066 | DPP10-AS1      | chr2  | 33080  | -3.54464 | up   | 0.0165  |
| XLOC_003974 | RP11-782C8.1   | chr1  | 29044  | -2.8053  | up   | 0.01675 |
| XLOC_035452 | AP001422.3     | chr21 | 14528  | -1.79338 | up   | 0.01675 |
| XLOC_012480 | RP11-689B22.2  | chr12 | 14244  | -4.94    | up   | 0.017   |
| XLOC_008493 | RP5-1024C24.1  | chr11 | 51962  | 3.05043  | down | 0.0173  |
| XLOC_003381 | RP4-631H13.4   | chr1  | 2642   | 3.90766  | down | 0.0173  |
| XLOC_058590 | RP11-49C9.2    | chrX  | 4608   | -1.94333 | up   | 0.01735 |
| XLOC_032146 | RAB6C-AS1      | chr2  | 13875  | -5.24285 | up   | 0.0186  |
| XLOC_027467 | CTD-3073N11.9  | chr19 | 9677   | N/A      | up   | 0.0186  |
| XLOC_003329 | FOXD2-AS1      | chr1  | 6419   | -2.46833 | up   | 0.01865 |
| XLOC_020948 | VAC14-AS1      | chr16 | 18154  | -3.22305 | up   | 0.01875 |
| XLOC_047237 | RP3-332B22.1   | chr6  | 120881 | 1.83817  | down | 0.0188  |
| XLOC_053416 | AF186192.5     | chr8  | 10445  | 1.21189  | down | 0.019   |
| XLOC_022433 | RP11-459C13.1  | chr17 | 10864  | 3.38714  | down | 0.0193  |
| XLOC_030445 | AC009336.24    | chr2  | 1292   | -3.9358  | up   | 0.0199  |
| XLOC_003897 | RP5-1086K13.1  | chr1  | 18379  | -2.0083  | up   | 0.0204  |
| XLOC_002760 | RP11-185B14.1  | chr1  | 24374  | 2.42918  | down | 0.0205  |
| XLOC_029899 | RP11-76I14.1   | chr2  | 227454 | -1.82384 | up   | 0.02065 |
| XLOC_000252 | MST1P2         | chr1  | 5281   | -1.60187 | up   | 0.0208  |
| XLOC_007083 | RP11-20J15.3   | chr10 | 7670   | -3.3418  | up   | 0.02135 |
| XLOC_037067 | RP11-222K16.2  | chr3  | 2293   | -2.48006 | up   | 0.0216  |
| XLOC_021601 | CTB-134H23.3   | chr16 | 54733  | -2.46614 | up   | 0.0217  |
| XLOC_004272 | RP11-85G21.2   | chr1  | 28962  | -2.36794 | up   | 0.0217  |
| XLOC_018974 | DNM1P47        | chr15 | 52424  | 1.6997   | down | 0.02205 |
| XLOC_024943 | RP11-285E9.6   | chr17 | 25065  | -2.42637 | up   | 0.02245 |
| XLOC_025768 | LINC00470      | chr18 | 153962 | 2.51885  | down | 0.0225  |
| XLOC_019813 | RP11-97O12.2   | chr15 | 19739  | 1.3561   | down | 0.02275 |
| XLOC_029917 | AC012360.6     | chr2  | 15802  | 2.86472  | down | 0.0228  |
| XLOC_032792 | CXCR2P1        | chr2  | 7053   | -2.83804 | up   | 0.02345 |
| XLOC_052710 | RP11-726G23.11 | chr8  | 3541   | N/A      | up   | 0.0236  |
| XLOC_006257 | MBL1P          | chr10 | 45439  | -1.43207 | up   | 0.0237  |
| XLOC_036719 | Z83851.1       | chr22 | 4837   | -1.25113 | up   | 0.02405 |
| XLOC_056342 | VN1R48P        | chr9  | 8935   | 2.19661  | down | 0.0242  |
| XLOC_042599 | RP11-10K16.1   | chr4  | 38091  | -1.77298 | up   | 0.0246  |
| XLOC_011844 | RP5-1057I20.2  | chr12 | 13258  | -1.93522 | up   | 0.02485 |
| XLOC_053218 | HAS2-AS1       | chr8  | 8009   | -1.70322 | up   | 0.02495 |
| XLOC_039118 | LINC00882      | chr3  | 489834 | 1.50821  | down | 0.02495 |
| XLOC_009612 | RP11-480C22.1  | chr11 | 65972  | N/A      | up   | 0.0252  |
| XLOC_033954 | RP11-290F20.3  | chr20 | 14064  | -1.55573 | up   | 0.02555 |
| XLOC_022217 | RP11-863P13.3  | chr16 | 9599   | -1.74321 | up   | 0.0258  |
| XLOC_025441 | LRRC37A7P      | chr18 | 6735   | -2.33239 | up   | 0.0259  |
| XLOC_023959 | KRT16P2        | chr17 | 2933   | -4.34843 | up   | 0.02625 |
| XLOC_009021 | CTD-2655K5.1   | chr11 | 8466   | 2.20008  | down | 0.0269  |
| XLOC_007302 | UNC5B-AS1      | chr10 | 1005   | -4.73369 | up   | 0.02715 |

|             |                    |       |        |          |      |         |
|-------------|--------------------|-------|--------|----------|------|---------|
| XLOC_015116 | TEX26-AS1          | chr13 | 51914  | -2.20007 | up   | 0.02735 |
| XLOC_000105 | RP11-242F24.1      | chr1  | 5376   | 2.48383  | down | 0.02865 |
| XLOC_029932 | AC096669.3         | chr2  | 27824  | 1.41885  | down | 0.0287  |
| XLOC_011737 | LINC00941          | chr12 | 8142   | -1.95788 | up   | 0.0288  |
| XLOC_026062 | LINC00669          | chr18 | 593402 | -2.8057  | up   | 0.02895 |
| XLOC_021011 | RP11-77K12.4       | chr16 | 22425  | -2.72474 | up   | 0.029   |
| XLOC_013181 | AC079630.4         | chr12 | 54389  | -3.80851 | up   | 0.02915 |
| XLOC_029175 | LINC00954          | chr2  | 27355  | -1.54278 | up   | 0.03075 |
| XLOC_046684 | TRAM2-AS1          | chr6  | 7332   | 1.10842  | down | 0.03075 |
| XLOC_000583 | RP5-884C9.2        | chr1  | 72597  | -2.07865 | up   | 0.03155 |
| XLOC_023471 | AC003051.1         | chr17 | 338184 | -2.64956 | up   | 0.03185 |
| XLOC_057082 | DBH-AS1            | chr9  | 3189   | -2.08853 | up   | 0.03215 |
| XLOC_006730 | AGGF1P2            | chr10 | 14716  | -1.78339 | up   | 0.03235 |
| XLOC_046129 | RP3-413H6.2        | chr6  | 50287  | -1.70673 | up   | 0.03235 |
| XLOC_031652 | DGUOK-AS1          | chr2  | 34841  | -1.68476 | up   | 0.03235 |
| XLOC_036385 | FAM230C            | chr22 | 24053  | -5.99997 | up   | 0.0324  |
| XLOC_022491 | ALOX12P2           | chr17 | 102882 | -1.11536 | up   | 0.03245 |
| XLOC_028716 | NAPSB              | chr19 | 10973  | -1.92336 | up   | 0.03265 |
| XLOC_057072 | LCN1P1             | chr9  | 8353   | 1.20234  | down | 0.03265 |
| XLOC_046280 | RP11-209A2.1       | chr6  | 41848  | -1.88258 | up   | 0.0329  |
| XLOC_031141 | MYCNOS             | chr2  | 21213  | 1.90168  | down | 0.03295 |
| XLOC_046348 | OR2I1P             | chr6  | 3053   | -4.84693 | up   | 0.0337  |
| XLOC_021603 | RP11-426C22.4      | chr16 | 3684   | -2.0403  | up   | 0.03375 |
| XLOC_021969 | RP11-297D21.2      | chr16 | 7712   | 2.03151  | down | 0.03375 |
| XLOC_000851 | RP11-90C4.1        | chr1  | 221096 | -1.69823 | up   | 0.0339  |
| XLOC_030754 | AC093850.2         | chr2  | 3225   | -3.85277 | up   | 0.0341  |
| XLOC_051664 | SLC26A4-AS1        | chr7  | 8738   | 1.02434  | down | 0.03415 |
| XLOC_005038 | RP11-443B7.1       | chr1  | 12767  | -1.61485 | up   | 0.0347  |
| XLOC_025506 | CTD-2130O13.1      | chr18 | 332178 | -9.35154 | up   | 0.03515 |
| XLOC_021869 | RP11-212I21.2      | chr16 | 37728  | -2.10109 | up   | 0.0354  |
| XLOC_001490 | FCGR1C             | chr1  | 9072   | -1.89673 | up   | 0.03555 |
| XLOC_056548 | RP11-151D14.1      | chr9  | 15700  | 1.68236  | down | 0.0362  |
| XLOC_060343 | RP11-424G14.1      | chrY  | 2666   | 2.23223  | down | 0.03635 |
| XLOC_046415 | XXbac-BPG248L24.12 | chr6  | 991    | -3.33194 | up   | 0.0364  |
| XLOC_025573 | CTD-2008L17.2      | chr18 | 1927   | 2.78548  | down | 0.0366  |
| XLOC_055017 | IFNWP19            | chr9  | 12423  | -2.78212 | up   | 0.03665 |
| XLOC_056744 | NAMA               | chr9  | 21904  | 1.3022   | down | 0.03705 |
| XLOC_043546 | SHFM1P1            | chr5  | 48391  | -2.9186  | up   | 0.03715 |
| XLOC_007245 | RP11-174J11.1      | chr10 | 8088   | -2.12605 | up   | 0.0372  |
| XLOC_026594 | CTD-3193O13.11     | chr19 | 736    | -3.60701 | up   | 0.03735 |
| XLOC_013573 | NTAN1P3            | chr12 | 18066  | -3.101   | up   | 0.0375  |
| XLOC_059231 | XIST               | chrX  | 32103  | -2.22673 | up   | 0.03765 |
| XLOC_052428 | RP11-369K16.1      | chr8  | 3814   | 2.19977  | down | 0.03765 |
| XLOC_035756 | KB-1592A4.13       | chr22 | 27985  | -2.89875 | up   | 0.03845 |
| XLOC_018852 | LINC00925          | chr15 | 37108  | 1.32831  | down | 0.03875 |

|             |                   |       |        |          |      |         |
|-------------|-------------------|-------|--------|----------|------|---------|
| XLOC_001283 | RP3-522D1.1       | chr1  | 27844  | -3.85001 | up   | 0.0397  |
| XLOC_036170 | RNU12             | chr22 | 1531   | 3.24202  | down | 0.0418  |
| XLOC_019142 | RP11-16E12.2      | chr15 | 9583   | -1.29701 | up   | 0.0419  |
| XLOC_024597 | RP5-1029K10.2     | chr17 | 68408  | -2.43055 | up   | 0.04235 |
| XLOC_006573 | RP11-106M7.1      | chr10 | 15116  | 2.20876  | down | 0.04265 |
| XLOC_032169 | AC133785.1        | chr2  | 6017   | 1.84086  | down | 0.04315 |
| XLOC_050056 | AC002383.2        | chr7  | 53102  | 2.53381  | down | 0.0436  |
| XLOC_023631 | RP11-149I9.2      | chr17 | 8351   | -2.11635 | up   | 0.04485 |
| XLOC_031338 | AC016995.3        | chr2  | 110953 | 1.16534  | down | 0.04585 |
| XLOC_052604 | RP11-566H8.3      | chr8  | 113345 | 2.81078  | down | 0.0461  |
| XLOC_011812 | RP11-118A3.1      | chr12 | 188409 | -10.1038 | up   | 0.0462  |
| XLOC_026920 | CTD-2332E11.2     | chr19 | 6663   | 1.64473  | down | 0.04635 |
| XLOC_058946 | KRT8P14           | chrX  | 202654 | -9.93261 | up   | 0.04645 |
| XLOC_018745 | RP11-16K12.1      | chr15 | 7038   | -4.32449 | up   | 0.04745 |
| XLOC_034947 | MIR155HG          | chr21 | 14595  | -2.7093  | up   | 0.04745 |
| XLOC_029663 | DUXAP1            | chr2  | 1258   | 2.10032  | down | 0.0479  |
| XLOC_058181 | LL0XNC01-131B10.2 | chrX  | 778    | -2.73377 | up   | 0.0481  |
| XLOC_013876 | RP11-554D14.2     | chr12 | 22420  | -2.38552 | up   | 0.04885 |
| XLOC_008491 | RP4-710M3.1       | chr11 | 12979  | 2.24876  | down | 0.0489  |
| XLOC_012692 | RP4-765H13.1      | chr12 | 212692 | -6.02887 | up   | 0.0492  |
| XLOC_018600 | HMG2N2P40         | chr15 | 22231  | 2.11509  | down | 0.04925 |
| XLOC_037072 | LINC00693         | chr3  | 184033 | 1.30806  | down | 0.0497  |
| XLOC_024468 | RP11-527L4.5      | chr17 | 8569   | -1.74969 | up   | 0.0498  |
| XLOC_007311 | RP11-442H21.2     | chr10 | 1066   | -1.36532 | up   | 0.04995 |

Notes: For some lncRNAs that were not detected in group 2, so a ratio could not be calculated.
