# Supplementary material for: Comprehensive analysis of long noncoding RNA–mRNA co-expression patterns in thyroid cancer
Source: Royal Society of Chemistry journal article supplement (doi:10.1039/c7mb00375g), 2017-08-04
Supplement: c7mb00375g1.zip [file c7mb00375g1.zip]

# Comprehensive analysis of long non-coding RNA-mRNA co-expression patterns in thyroid cancer

Yaying Du, Wenfei Xia, Jinjun Zhang, Dongyi Wan, Zhifang Yang\* and Xingrui Li\*

**Supplementary Table 5:** Target gene prediction for the 240 unannotated lncRNAs

| lncRNA_name    | up stream.10kb | overlap | down stream.10kb | antisense       |
|----------------|----------------|---------|------------------|-----------------|
| RP11-353N14.2  |                |         |                  |                 |
| LINC00284      |                |         |                  |                 |
| CTD-2020K17.1  |                |         |                  | FMNL1           |
| FER1L4         |                |         |                  |                 |
| ESPNP          |                |         |                  |                 |
| AC004540.5     |                |         |                  |                 |
| LINC00887      | CPN2 4569bp;   |         |                  |                 |
| RP11-1016B18.1 |                |         |                  |                 |
| LINC00457      |                |         |                  |                 |
| AC007255.8     |                |         |                  | CHN2 PRR15      |
| RP11-469H8.6   |                |         |                  | AQP2            |
| AC002331.1     |                |         |                  |                 |
| IL12A-AS1      |                |         |                  | IL12A LINC01100 |
| SIGLEC17P      |                |         |                  |                 |
| ANKRD36BP2     |                |         |                  |                 |
| CYP1B1-AS1     | RMDN2 8506bp;  |         |                  |                 |
| ABCC6P1        |                |         |                  |                 |
| RP11-362F19.1  |                |         |                  |                 |
| RP11-66B24.4   |                |         |                  | LRRK1           |
| LINC00996      |                |         | GIMAP8 285bp;    |                 |
| HCG22          |                |         |                  |                 |
| RP4-663N10.2   |                |         |                  |                 |
| LINC00607      |                |         |                  |                 |
| AC010970.2     |                |         |                  |                 |
| ITGB2-AS1      |                |         |                  |                 |
| RP11-476D10.1  |                |         |                  |                 |
| RP11-115D19.1  |                |         |                  | SNCA            |
| CTA-126B4.7    |                |         |                  |                 |
| RP11-230G5.2   |                |         |                  | MSRB3           |
| PLEKHA8P1      |                |         |                  | ANO6            |
| LINC00086      |                |         |                  |                 |
| RP11-923I11.5  |                |         |                  |                 |
| HOXD-AS1       |                |         |                  | HOXD1           |
| AC068492.1     |                |         |                  |                 |
| RP3-525N10.2   |                |         |                  | BAI3            |
| RP11-44N11.2   |                |         |                  |                 |

|                |                  |             |                  |         |
|----------------|------------------|-------------|------------------|---------|
| RP11-417E7.2   |                  |             |                  |         |
| RP11-547D24.1  |                  |             | C1orf222 9363bp; |         |
| RP11-85G21.3   |                  |             |                  |         |
| AC079630.2     |                  |             |                  |         |
| RP11-279F6.3   |                  |             |                  |         |
| RP11-1008C21.1 |                  |             |                  |         |
| LINC00511      | SLC39A11 5400bp; |             |                  |         |
| RP11-893F2.9   |                  |             |                  | TMEM92  |
| RP11-125B21.2  |                  |             |                  | VLDLR   |
| RP5-1028K7.2   |                  |             |                  |         |
| RP11-136I14.5  |                  |             |                  |         |
| RP11-761N21.1  |                  |             |                  |         |
| MIR205HG       |                  |             |                  |         |
| YWHAEP7        |                  |             |                  |         |
| CASC15         |                  |             |                  |         |
| AL132709.1     |                  |             |                  |         |
| RP11-638F5.1   |                  |             |                  |         |
| RP1-158P9.1    |                  |             |                  |         |
| RP11-385J1.2   |                  |             |                  | KCNMB2  |
| RP5-1063M23.2  |                  |             |                  |         |
| LINC00426      |                  |             |                  |         |
| RP11-221N13.3  |                  |             |                  |         |
| ADAMTS9-AS1    |                  |             |                  | ADAMTS9 |
| RP4-758J18.10  |                  |             | ANKRD65 5629bp;  |         |
| GUSBP2         |                  |             |                  |         |
| TCEB1P20       |                  |             |                  |         |
| RP11-290F5.1   | IRF2 5088bp;     |             |                  |         |
| RPSAP52        |                  | HMGA2       |                  | HMGA2   |
| EMR4P          |                  |             |                  |         |
| AC098592.8     |                  |             |                  |         |
| LRCOL1         |                  |             |                  |         |
| RP11-2E17.1    |                  |             |                  | FAH     |
| GAPDHP70       |                  |             |                  |         |
| LINC00900      |                  |             |                  |         |
| AC010980.2     |                  |             |                  |         |
| SSX8           |                  |             |                  | SSX7    |
| SFTA1P         |                  |             |                  |         |
| RP11-465B22.3  |                  |             |                  |         |
| AC008063.2     |                  |             |                  | DPP4    |
| RP11-402L6.1   |                  |             |                  | TMEM108 |
| AL450992.2     |                  |             |                  | THEM5   |
| LINC01021      |                  |             |                  |         |
| ENTPD1-AS1     |                  | CC2D2B CCNJ |                  | CCNJ    |
| RP11-64D22.2   | AADACL2 9089bp;  |             |                  |         |

|                |                   |       |                   |              |
|----------------|-------------------|-------|-------------------|--------------|
| LRP4-AS1       |                   | LRP4  |                   | LRP4         |
| RP11-115N4.1   |                   |       |                   |              |
| BPIFB9P        |                   |       |                   |              |
| RP11-473M20.5  | TNFRSF12A 9780bp; |       | MMP25 7539bp;     | CCDC64B      |
| RP11-707A18.1  |                   |       |                   |              |
| RP11-5407.3    | AL645608.1 151bp; |       |                   | SAMD11       |
| ILF3-AS1       |                   |       |                   |              |
| CTD-2269F5.1   |                   |       |                   | EDIL3        |
| RP11-624M8.1   |                   |       |                   | HEY2         |
| RP11-238K6.1   |                   |       |                   |              |
| RP11-53019.1   |                   |       |                   | MRPS30       |
| CYP17A1-AS1    |                   |       |                   | CYP17A1      |
| RP1-244F24.1   |                   |       |                   | RUNX2        |
| RP11-861A13.4  |                   |       |                   |              |
| MEG9           |                   |       |                   |              |
| HLA-DPB2       |                   |       |                   |              |
| TMCO5B         |                   |       |                   |              |
| AC003102.3     | SLC25A39 4200bp;  |       |                   | RUNDC3A      |
| RAP1AP         |                   |       |                   |              |
| RP11-465L10.10 |                   |       |                   | MMP9 SLC12A5 |
| RP11-81H14.2   |                   |       | MDM1 315bp;       |              |
| RP11-513G11.2  |                   |       |                   |              |
| AC063976.7     | P4HA2 7522bp;     |       |                   | P4HA2        |
| RP11-541H12.1  |                   |       |                   |              |
| AE000662.93    | DAD1 7849bp;      |       |                   | AE000662.92  |
| CTA-384D8.35   | SYCE3 3145bp;     |       |                   |              |
| AC104655.3     |                   |       |                   |              |
| RP4-728D4.2    |                   |       | KIAA0319L 9986bp; | TFAP2E       |
| LINC01094      |                   |       |                   |              |
| AC093627.11    |                   |       | FAM20C 4528bp;    |              |
| LINC01088      |                   |       |                   | NAA11        |
| RP11-168G16.2  |                   |       |                   | CERS3        |
| PI4KAP1        |                   |       |                   |              |
| RP6-24A23.3    |                   |       |                   |              |
| RP11-118F19.1  |                   |       |                   | GSE1         |
| RP11-245M24.1  |                   |       |                   |              |
| LINC00973      |                   |       |                   |              |
| RP11-638I2.8   | SLC25A47 3412bp;  |       |                   | WARS         |
| MKRN9P         |                   |       |                   |              |
| RP11-214C8.2   | ICAM2 1777bp;     |       |                   | C17orf72     |
| CTC-255N20.1   |                   |       |                   | STK32A       |
| VN1R51P        |                   |       |                   |              |
| RP11-455F5.5   | BOLA2B 7977bp;    |       |                   | CORO1A       |
| RP3-340B19.3   |                   | FKBP5 |                   | FKBP5        |

|                |                 |        |               |         |
|----------------|-----------------|--------|---------------|---------|
| U1             |                 | CROCC  |               |         |
| RP11-838N2.4   | TGIF1 7448bp;   |        |               |         |
| LINC00359      |                 |        |               |         |
| DPP10-AS1      |                 |        |               | DPP10   |
| RP11-782C8.1   |                 |        |               |         |
| AP001422.3     |                 |        |               |         |
| RP11-689B22.2  |                 |        |               | SELPLG  |
| RP5-1024C24.1  |                 |        |               | MPPED2  |
| RP4-631H13.4   |                 | ECHDC2 |               |         |
| RP11-49C9.2    |                 |        |               |         |
| RAB6C-AS1      |                 |        |               | RAB6C   |
| CTD-3073N11.9  | SIGLEC6 133bp;  |        |               | SIGLEC6 |
| FOXD2-AS1      |                 |        |               | FOXD2   |
| VAC14-AS1      |                 |        |               | VAC14   |
| RP3-332B22.1   |                 |        |               |         |
| AF186192.5     |                 |        |               |         |
| RP11-459C13.1  |                 |        |               |         |
| AC009336.24    |                 |        | HOXD1 9571bp; |         |
| RP5-1086K13.1  | CD58 9033bp;    |        |               |         |
| RP11-185B14.1  |                 |        | RERE 6769bp;  |         |
| RP11-76I14.1   |                 |        |               |         |
| MST1P2         |                 |        |               |         |
| RP11-20J15.3   | CXCL12 1369bp;  |        |               |         |
| RP11-222K16.2  |                 |        |               |         |
| CTB-134H23.3   |                 |        |               |         |
| RP11-85G21.2   |                 |        |               |         |
| DNM1P47        |                 |        | OR4F6 3292bp; |         |
| RP11-285E9.6   |                 |        |               | 9-Sep   |
| LINC00470      |                 |        |               |         |
| RP11-97O12.2   |                 |        |               |         |
| AC012360.6     | C2orf49 3218bp; |        |               | FHL2    |
| CXCR2P1        |                 |        |               | RUFY4   |
| RP11-726G23.11 |                 |        |               |         |
| MBL1P          |                 | SFTPD  |               |         |
| Z83851.1       |                 |        |               |         |
| VN1R48P        |                 |        |               |         |
| RP11-10K16.1   |                 |        |               | GALNT7  |
| RP5-1057I20.2  |                 |        |               | HDAC7   |
| HAS2-AS1       |                 |        |               | HAS2    |
| LINC00882      |                 |        |               |         |
| RP11-480C22.1  |                 |        |               |         |
| RP11-290F20.3  |                 |        |               |         |
| RP11-863P13.3  |                 |        |               |         |
| LRRC37A7P      |                 |        |               |         |

|                   |                  |             |                |               |
|-------------------|------------------|-------------|----------------|---------------|
| KRT16P2           |                  |             |                |               |
| CTD-2655K5.1      |                  |             |                |               |
| UNC5B-AS1         |                  |             |                | UNC5B         |
| TEX26-AS1         |                  | MEDAG       |                | MEDAG TEX26   |
| RP11-242F24.1     |                  |             |                |               |
| AC096669.3        |                  |             |                |               |
| LINC00941         |                  |             |                |               |
| LINC00669         |                  |             |                |               |
| RP11-77K12.4      |                  |             |                | CHST6         |
| AC079630.4        |                  | LRRK2 LRRK2 |                |               |
| LINC00954         |                  |             |                |               |
| TRAM2-AS1         |                  |             |                | TRAM2         |
| RP5-884C9.2       |                  |             |                |               |
| AC003051.1        |                  |             |                |               |
| DBH-AS1           | SARDH 1958bp;    |             |                | DBH           |
| AGGF1P2           |                  |             |                |               |
| RP3-413H6.2       |                  |             |                |               |
| DGUOK-AS1         |                  |             |                | DGUOK         |
| FAM230C           |                  |             |                |               |
| ALOX12P2          |                  |             |                |               |
| NAPSB             |                  |             |                | NR1H2         |
| LCN1P1            |                  |             |                |               |
| RP11-209A2.1      |                  |             |                |               |
| MYCNOS            |                  |             |                | MYCN          |
| OR2IIP            |                  |             |                |               |
| RP11-426C22.4     |                  |             |                |               |
| RP11-297D21.2     | ATP6V0D1 5371bp; |             | ZDHHC1 8099bp; | ZDHHC1        |
| RP11-90C4.1       |                  |             |                |               |
| AC093850.2        |                  |             |                |               |
| SLC26A4-AS1       |                  |             |                | SLC26A4       |
| RP11-443B7.1      |                  |             |                |               |
| CTD-2130O13.1     |                  |             |                |               |
| RP11-212I21.2     |                  |             |                | MMP2          |
| FCGR1C            |                  |             |                |               |
| RP11-151D14.1     |                  |             |                |               |
| RP11-424G14.1     | KDM5D 9259bp;    |             |                |               |
| XXbac-BPG248L24.1 | HLA-B 2702bp;    |             |                | HLA-B         |
| CTD-2008L17.2     |                  |             |                |               |
| IFNWP19           | IFNA1 195bp;     |             |                |               |
| NAMA              |                  |             |                |               |
| SHFM1P1           |                  |             |                |               |
| RP11-174J11.1     |                  |             |                |               |
| CTD-3193O13.11    | EVI5L 5583bp;    |             |                | CTD-3193O13.9 |
| NTAN1P3           |                  |             |                |               |

|                   |  |          |              |         |
|-------------------|--|----------|--------------|---------|
| XIST              |  |          |              |         |
| RP11-369K16.1     |  | KIAA1456 |              |         |
| KB-1592A4.13      |  |          |              |         |
| LINC00925         |  |          |              |         |
| RP3-522D1.1       |  |          |              |         |
| RNU12             |  |          |              |         |
| RP11-16E12.2      |  |          |              |         |
| RP5-1029K10.2     |  | NGFR     |              | NGFR    |
| RP11-106M7.1      |  |          |              | ABLIM1  |
| AC133785.1        |  |          |              | ARHGEF4 |
| AC002383.2        |  |          |              |         |
| RP11-149I9.2      |  |          |              |         |
| AC016995.3        |  |          |              |         |
| RP11-566H8.3      |  |          |              |         |
| RP11-118A3.1      |  |          |              |         |
| CTD-2332E11.2     |  |          |              |         |
| KRT8P14           |  |          |              |         |
| RP11-16K12.1      |  |          |              | RASGRF1 |
| MIR155HG          |  |          |              |         |
| DUXAP1            |  | DNAH6    |              |         |
| LL0XNC01-131B10.2 |  |          |              |         |
| RP11-554D14.2     |  |          |              |         |
| RP4-710M3.1       |  |          |              |         |
| RP4-765H13.1      |  |          |              |         |
| HMG2P40           |  |          |              |         |
| LINC00693         |  |          |              |         |
| RP11-527L4.5      |  |          | MPP2 4733bp; | FAM215A |
| RP11-442H21.2     |  |          |              | DDIT4   |
