# Supplementary material for: Comprehensive analysis of long noncoding RNA–mRNA co-expression patterns in thyroid cancer
Source: Royal Society of Chemistry journal article supplement (doi:10.1039/c7mb00375g), 2017-08-04
Supplement: c7mb00375g1.zip [file c7mb00375g1.zip]

# Comprehensive analysis of long non-coding RNA-mRNA co-expression patterns in thyroid cancer

Yaying Du, Wenfei Xia, Jinjun Zhang, Dongyi Wan, Zhifang Yang\* and Xingrui Li\*

**Supplementary Table 9** Clinicopathological parameters of 45 papillary thyroid carcinoma patients

| Characteristic        | n          | Tumor stage |                                      |                   | p-value |
|-----------------------|------------|-------------|--------------------------------------|-------------------|---------|
|                       |            | I           | III                                  | IV                |         |
|                       | 45         | 38          | 5                                    | 2                 |         |
| Gender                |            |             |                                      |                   | 0.501   |
| male                  | 11         | 10          | 1                                    | 0                 |         |
| female                | 34         | 28          | 4                                    | 2                 |         |
| Age (mean&range)      | 40 (21-64) | 37 (21-61)  | 57.2 (60-62)                         | 54.5 (47-62)      | 0.001** |
| Tumor size            |            |             |                                      |                   | 0.559   |
| ≤1cm                  | 10         | 9           | 1                                    | 0                 |         |
| 1-2cm                 | 24         | 20          | 3                                    | 1                 |         |
| 2-4cm                 | 8          | 7           | 0                                    | 1                 |         |
| ≥4cm                  | 3          | 2           | 1                                    | 0                 |         |
| average               | 1.93       | 1.74        | 3.54                                 | 1.5               | 0.998   |
| Lymph node metastasis |            |             |                                      |                   | 0.335   |
| Y                     | 27         | 22          | 3                                    | 2                 |         |
| N                     | 18         | 16          | 2                                    | 0                 |         |
| Pathological pattern  |            |             |                                      |                   | 0.01**  |
| CPTC                  | 42         | 37          | 3                                    | 2                 |         |
| Other PTC             | 3          | 1 (NIFTP)   | 2 (FVPTC)                            | 0                 |         |
| Advanced disease      | 2          | 0           | 1 (invade subcutaneous soft tissues) | 1 (invade larynx) |         |



---

Notes: PTC, papillary thyroid cancer; CPTC, conventional papillary thyroid cancer, NIFTP, noninvasive follicular thyroid neoplasm with papillary-like nuclear features, FVPTC, invasive follicular-variant papillary thyroid cancer.

\* \* Indicate statistical significance  $P < 0.01$ .
